# Supplementary material for: Metal-free 1,3-dipolar cyclization of azides with HFO-1233zd(E) in the presence of amines: one-step regioselective synthesis of 1-N-substituted 1,2,3-triazole-4-carboxamide derivatives
Source: Royal Society of Chemistry journal article supplement (doi:10.1039/d3qo00333g), 2023-01-01

## *Supporting Information*

### **Metal-free 1,3-dipolar cyclization of azides with HFO-1233zd(*E*) under amines participation: one-step regioselective synthesis of 1- *N*-substituted 1,2,3-triazole-4-carboxamide derivatives**

#### **Table of contents**

1. Experimental (General procedures and characterization data)
2. Optimization of reaction conditions
3. <sup>1</sup>H and <sup>13</sup>C NMR Spectra for **4** and **5**
4. NMR/HRMS Spectra of Intermediates

## 1. Experimental

**General.** All reactions were carried out in test tube under air atmosphere. Chemicals were purchased from commercial suppliers and used without further purification. Purification of reaction products were carried out by chromatography using silica gel (200-300 mesh). High resolution MS data were recorded on Agilent 6200 Series TOF spectrometer. NMR spectra were recorded on AVIII for  $^1\text{H}$  NMR at 500/400 MHz and for  $^{13}\text{C}$  NMR at 125/100 MHz. For  $^1\text{H}$  NMR, tetramethylsilane (TMS) was served as internal standard ( $\delta$ ). The spectra data presented here are reported as follows: chemical shift, integration, multiplicity (s = singlet, d = doublet, t = triplet, q = quartet, m = multiplet), and coupling constant(s) in Hertz. For  $^{13}\text{C}$  NMR TMS was used as internal standard and spectra were obtained with complete proton decoupling.

### General procedure for the synthesis of aryl azide **1**

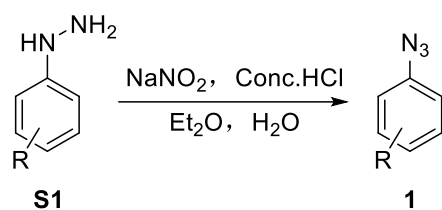

**S1** (97%, 1.91 mL, 18.8 mmol) was dissolved in water (19 mL) and concentrated hydrochloric acid (3.44 mL) followed by the addition of ether (24 mL) and subsequently the temperature of the reaction system was controlled at zero degrees. A solution of NaNO<sub>2</sub> (1.56 g, 22.6 mmol) dissolved in water (2 mL) was slowly dropped into the above system via syringe over 30 mins with vigorous stirring, controlling the internal temperature below 5°C. Stir the solution for 1 hour. The reaction solution was filtered and the aqueous layer was washed with ether (3 x 80 mL), followed by washing the combined ether layers with brine (80 mL). The organic layer was concentrated by drying with sodium sulfate and purified by silica gel chromatography (pure petroleum ether) to give a light-yellow oil **1** (Note: Azides poses an explosion risk).

## General procedure for the synthesis of (*E*)-1-(3,3,3-trifluoroprop-1-en-1-yl)

### piperidine **A**

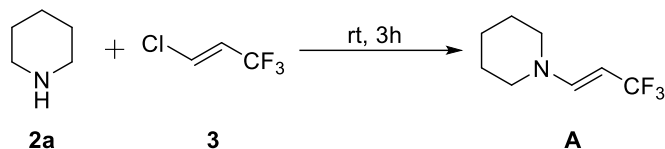

**3** (2.63g, 20.2 mmol) was added to **2a** (6.88g, 80.8 mmol) under ice bath conditions, followed by stirring at room temperature for 3 hours. The white solid was filtered and the resulting filtrate was distilled under reduced pressure to give **A**.

## General procedure for the synthesis of 1-(3,3-di(piperidin-1-yl) allylidene)

### piperidin-1-ium **C**

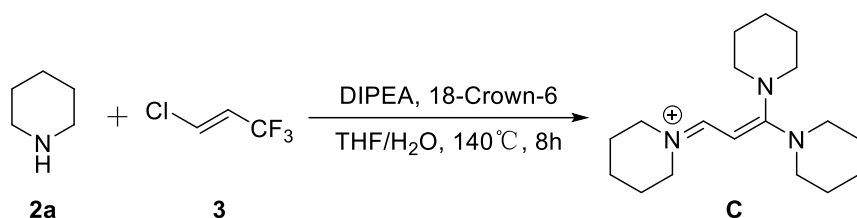

Add **2a** (5.0 mmol), DIPEA (3.0 mmol), 18-crown-6 (1.0 mmol) and THF/H<sub>2</sub>O=3:1 (2.0 mL) to the Schlenk tube at room temperature. Subsequently trans-1-chloro-3,3,3-trifluoropropene (HFO-1233zd (*E*)) **3** (2.0 mL) was added to the mixture and the resulting mixture was stirred at 140°C for 8 hours. The reaction was cooled to room temperature, evaporated under vacuo. The residue was purified by flash column chromatography (dichloromethane: methanol=10:1) on silica gel to give the desired products **C**.

## General procedure for the synthesis of target compounds **4**

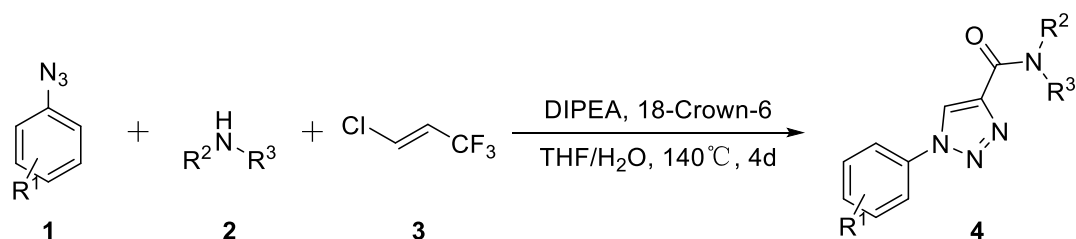

Add azobenzenes **1** (1.0 mmol), amines **2** (5.0 mmol), DIPEA (3.0 mmol), 18-crown-6

(1.0 mmol) and THF/H<sub>2</sub>O=3:1 (2.0 mL) to the Schlenk tube at room temperature. Subsequently trans-1-chloro-3,3,3-trifluoropropene (HFO-1233zd (*E*)) **3** (2.0 mL) was added to the mixture and the resulting mixture was stirred at 140°C for 4 days. The reaction was cooled to room temperature, evaporated under vacuo. The residue was purified by flash column chromatography (petroleum ether: ethyl acetate=10:3) on silica gel to give the desired products **4**.

### General procedure for the synthesis of target compound **5**

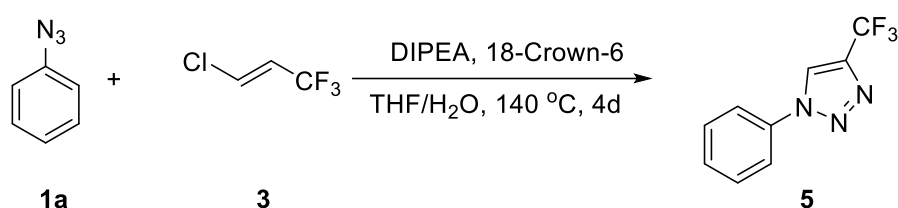

Add azobenzenes **1a** (1.0 mmol), DIPEA (3.0 mmol), 18-crown-6 (1.0 mmol) and THF/H<sub>2</sub>O=3:1 (2.0 mL) to the Schlenk tube at room temperature. Subsequently trans-1-chloro-3,3,3-trifluoropropene (HFO-1233zd (*E*)) **3** (2.0 mL) was added to the mixture and the resulting mixture was stirred at 140°C for 4 days. The reaction was cooled to room temperature, evaporated under vacuo. The residue was purified by flash column chromatography (petroleum ether: ethyl acetate=10:3) on silica gel to give the desired products **5**.

### Characterization data for **A**

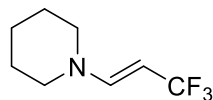

(*E*)-1-(3,3,3-trifluoroprop-1-en-1-yl) piperidine (**A**)

Yellow liquid, yield:3.5g, 98%.

<sup>1</sup>H NMR (400 MHz, CDCl<sub>3</sub>) δ 6.62 (dd, *J* = 13.6, 1.4 Hz, 1H), 4.28 (dq, *J* = 13.1, 6.4 Hz, 1H), 3.01 (s, 4H), 2.79 (s, 2H), 1.84 (s, 1H), 1.53 – 1.50 (m, 3H).

### Characterization data for **C**

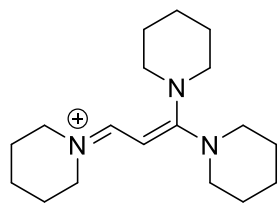

1-(3,3-di(piperidin-1-yl) allylidene) piperidin-1-ium (**C**)

Yellow liquid, yield:200mg, 82%

$^1\text{H}$  NMR (400 MHz,  $\text{CDCl}_3$ )  $\delta$  11.13 (s, 1H), 8.03 (d,  $J = 12.4$  Hz, 1H), 4.42 (d,  $J = 12.4$  Hz, 1H), 3.71 – 3.62 (m, 2H), 3.53 (d,  $J = 3.2$  Hz, 2H), 3.38 (s, 1H), 3.11 (qd,  $J = 7.4, 4.3$  Hz, 2H), 1.93 (s, 3H), 1.76 – 1.67 (m, 6H), 1.59 – 1.54 (m, 8H), 1.46 (d,  $J = 6.8$  Hz, 6H);  $^{13}\text{C}$  NMR (101 MHz,  $\text{CDCl}_3$ )  $\delta$  170.7, 156.8, 80.8, 42.0, 26.2, 24.0, 18.7, 17.4, 12.1; HRMS calcd for  $\text{C}_{18}\text{H}_{32}\text{N}_3^+$ : 290.2591, found:290.2598.

#### Characterization data for target compounds 4

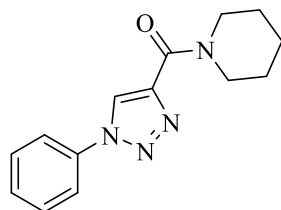

(1-phenyl-1H-1,2,3-triazol-4-yl) (piperidin-1-yl) methanone (**4a**)

White solid, yield:174mg, 68%, m.p.: 144.7-145.5 °C.

$^1\text{H}$  NMR (400 MHz,  $\text{CDCl}_3$ ):  $\delta$  8.48 (s, 1H), 7.77 – 7.75 (m, 2H), 7.57-7.53 (m, 2H), 7.49-7.46 (m, 1H), 4.19 (d,  $J = 5.2$  Hz, 2H), 3.75 (t,  $J = 4.8$  Hz, 2H), 1.72 (s, 6H);  $^{13}\text{C}$  NMR (100 MHz,  $\text{CDCl}_3$ ):  $\delta$  159.6, 145.30, 136.6, 129.9, 129.2, 126.0, 120.7, 48.0, 44.0, 26.8, 25.8, 24.7; HRMS calcd for  $\text{C}_{14}\text{H}_{16}\text{N}_4\text{O}+\text{H}^+$ : 257.1397, found: 257.1394.

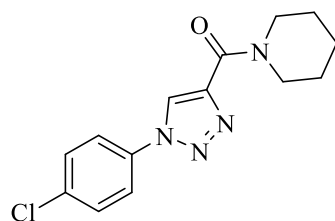

(1-(4-chlorophenyl)-1H-1,2,3-triazol-4-yl) (piperidin-1-yl) methanone (**4b**)

White solid, yield:151mg, 52%, m.p.: 215.9-216.5 °C.

$^1\text{H}$  NMR (400 MHz,  $\text{CDCl}_3$ ):  $\delta$  8.47 (s, 1H), 7.71 (d,  $J = 8.8$  Hz, 2H), 7.52 (d,  $J = 8.8$  Hz, 2H), 4.17 (s, 2H), 3.74 (s, 2H), 1.71 (s, 6H);  $^{13}\text{C}$  NMR (100 MHz,  $\text{CDCl}_3$ ):  $\delta$  159.4, 145.5, 135.1, 135.1, 130.1, 126.0, 121.8, 48.0, 44.0, 26.8, 25.8, 24.7; HRMS calcd for  $\text{C}_{14}\text{H}_{15}\text{ClN}_4\text{O}+\text{H}^+$ : 291.1007, found: 291.1005.

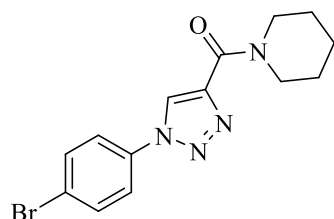

(1-(4-bromophenyl)-1H-1,2,3-triazol-4-yl) (piperidin-1-yl) methanone (**4c**)

White solid, yield: 241mg, 72%, m.p.: 223.0-223.6 °C.

$^1\text{H}$  NMR (400 MHz,  $\text{CDCl}_3$ ):  $\delta$  8.47 (s, 1H), 7.70 – 7.67 (m, 2H), 7.66 – 7.64 (m, 2H), 4.17 (d,  $J = 5.6$  Hz, 2H), 3.74(t,  $J = 4.8$  Hz, 2H), 1.71 (s, 6H);  $^{13}\text{C}$  NMR (100 MHz,  $\text{CDCl}_3$ ):  $\delta$  159.4, 145.6, 135.6, 133.1, 125.9, 123.0, 122.0, 48.0, 44.0, 26.8, 25.8, 24.7; HRMS calcd for  $\text{C}_{14}\text{H}_{15}\text{BrN}_4\text{O}+\text{H}^+$ : 335.0502, found: 335.0505.

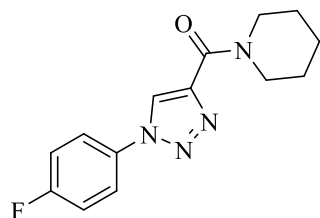

(1-(4-fluorophenyl)-1H-1,2,3-triazol-4-yl) (piperidin-1-yl) methanone (**4d**)

White solid, yield: 140mg, 51%, m.p.: 128.6-129.4 °C.

$^1\text{H}$  NMR (500 MHz,  $\text{CDCl}_3$ ):  $\delta$  8.44 (s, 1H), 7.75-7.72 (m, 2H), 7.26-7.23 (m, 2H), 4.18 (d,  $J = 4.5$  Hz, 2H), 3.75 (d,  $J = 5.5$  Hz, 2H), 1.71 (s, 6H);  $^{13}\text{C}$  NMR (125 MHz,  $\text{CDCl}_3$ ):  $\delta$  163.7, 161.7, 159.5, 145.5, 126.2, 122.7 (122.72, 122.65, d,  $J = 8.8$  Hz), 116.9 (117.0, 116.8, d,  $J = 22.5$  Hz), 48.0, 44.0, 26.8, 25.8, 24.7; HRMS calcd for  $\text{C}_{14}\text{H}_{15}\text{FN}_4\text{O}+\text{H}^+$ : 275.1303, found: 275.1306.

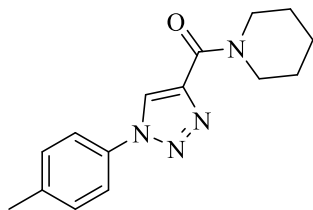

piperidin-1-yl(1-(p-tolyl)-1H-1,2,3-triazol-4-yl) methanone (**4e**)

White solid, yield: 95mg, 35%, m.p.: 184.3-184.9 °C.

$^1\text{H}$  NMR (400 MHz,  $\text{CDCl}_3$ ):  $\delta$  8.43 (s, 1H), 7.62 (d,  $J = 8.4$  Hz, 2H), 7.33 (d,  $J = 8.0$  Hz, 2H), 4.19 (d,  $J = 5.2$  Hz, 2H), 3.75 (d,  $J = 5.2$  Hz, 2H), 2.43 (s, 3H), 1.71 (s, 6H);  $^{13}\text{C}$  NMR (100 MHz,  $\text{CDCl}_3$ ):  $\delta$  159.7, 145.2, 139.4, 134.3, 130.4, 126.0, 120.6, 48.0, 43.9, 26.8, 25.8, 24.7, 21.1; HRMS calcd for  $\text{C}_{15}\text{H}_{18}\text{N}_4\text{O}+\text{H}^+$ : 271.1553, found: 271.1557.

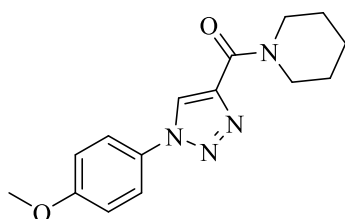

(1-(4-methoxyphenyl)-1H-1,2,3-triazol-4-yl) (piperidin-1-yl) methanone (**4f**)

White solid, yield: 94mg, 33%, m.p.: 171.6-172.3 °C.

$^1\text{H}$  NMR (500 MHz,  $\text{CDCl}_3$ ):  $\delta$  8.39 (s, 1H), 7.65 (d,  $J = 9.0$  Hz, 2H), 7.04 (d,  $J = 9.0$  Hz, 2H), 4.19 (s, 2H), 3.88 (s, 3H), 3.75 (d,  $J = 5.0$  Hz, 2H), 1.72 (s, 6H);  $^{13}\text{C}$  NMR (125 MHz,  $\text{CDCl}_3$ ):  $\delta$  160.2, 147.7, 145.1, 130.0, 126.1, 122.3, 115.0, 55.7, 48.0, 44.0, 26.8, 25.8, 24.7; HRMS calcd for  $\text{C}_{15}\text{H}_{18}\text{N}_4\text{O}_2+\text{H}^+$ : 287.1503, found: 287.1501.

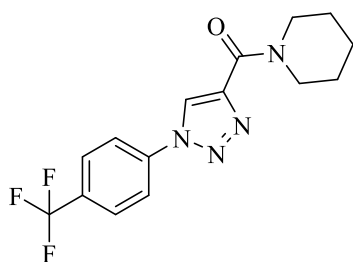

piperidin-1-yl(1-(4-(trifluoromethyl) phenyl)-1H-1,2,3-triazol-4-yl) methanone (**4g**)

White solid, yield: 175mg, 54%, m.p.: 213.1-213.7 °C.

$^1\text{H}$  NMR (500 MHz,  $\text{CDCl}_3$ ):  $\delta$  8.56 (s, 1H), 7.93 (d,  $J = 8.5$  Hz, 2H), 7.83 (d,  $J = 8.5$  Hz, 2H), 4.18 (d,  $J = 5.5$  Hz, 2H), 3.75 (d,  $J = 5.0$  Hz, 2H), 1.72 (s, 6H);  $^{13}\text{C}$  NMR (125 MHz,  $\text{CDCl}_3$ ):  $\delta$  159.3, 145.8, 139.0, 131.4, 131.2, 127.3 (127.33, 127.30, 127.27, 127.24, q,  $J = 3.8$  Hz), 126.0, 124.5, 122.4, 120.7, 48.0, 44.0, 26.8, 25.8, 24.6; HRMS calcd for  $\text{C}_{15}\text{H}_{15}\text{F}_3\text{N}_4\text{O}+\text{H}^+$ : 325.1271, found: 325.1274.

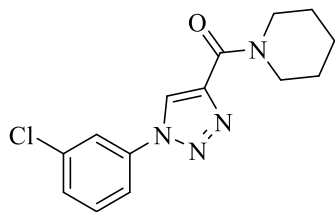

(1-(3-chlorophenyl)-1H-1,2,3-triazol-4-yl) (piperidin-1-yl) methanone (**4h**)

White solid, yield: 125mg, 43%, m.p.: 132.0-132.6 °C.

$^1\text{H}$  NMR (400 MHz,  $\text{CDCl}_3$ ):  $\delta$  8.48 (s, 1H), 7.83 (t,  $J = 2.0$  Hz, 1H), 7.65 (dt,  $J = 7.2$ , 1.8 Hz, 1H), 7.51-7.44 (m, 2H), 4.17 (d,  $J = 5.2$  Hz, 2H), 3.74 (t,  $J = 1.2$  Hz, 2H), 1.72 (s, 6H);  $^{13}\text{C}$  NMR (100 MHz,  $\text{CDCl}_3$ ):  $\delta$  159.4, 145.6, 137.5, 135.8, 131.0, 129.3, 126.0, 121.0, 118.6, 48.0, 44.0, 26.8, 25.8, 24.7; HRMS calcd for  $\text{C}_{14}\text{H}_{15}\text{ClN}_4\text{O}+\text{H}^+$ : 291.1007, found: 291.1005.

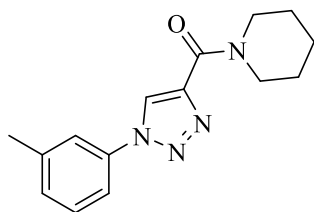

piperidin-1-yl(1-(m-tolyl)-1H-1,2,3-triazol-4-yl) methanone (**4i**)

White solid, yield: 46mg, 17%, m.p.: 119.7-121.1 °C.

$^1\text{H}$  NMR (500 MHz,  $\text{CDCl}_3$ ):  $\delta$  8.45 (s, 1H), 7.58 (s, 1H), 7.52 (d,  $J = 8.0$  Hz, 1H), 7.41 (t,  $J = 8.0$  Hz, 1H), 7.28 (d,  $J = 7.5$  Hz, 1H), 4.19 (d,  $J = 5.0$  Hz, 2H), 3.74 (d,  $J = 5.0$  Hz, 2H), 2.46 (s, 3H), 1.72 (s, 6H);  $^{13}\text{C}$  NMR (125 MHz,  $\text{CDCl}_3$ ):  $\delta$  159.7, 145.2, 140.2, 136.6, 130.0, 129.7, 126.1, 121.3, 117.7, 48.0, 43.9, 26.8, 25.8, 24.7, 21.4; HRMS calcd for  $\text{C}_{15}\text{H}_{18}\text{N}_4\text{O}+\text{H}^+$ : 271.1553, found: 271.1557.



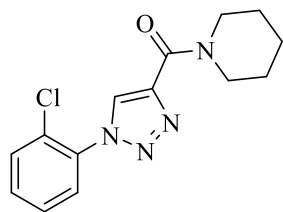

(1-(2-chlorophenyl)-1H-1,2,3-triazol-4-yl) (piperidin-1-yl) methanone (**4j**)

White solid, yield: 73mg, 25%, m.p.: 114.5-115.2 °C.

$^1\text{H}$  NMR (400 MHz,  $\text{CDCl}_3$ ):  $\delta$  8.46 (s, 1H), 7.63-7.59 (m, 2H), 7.51– 7.44 (m, 2H), 4.20 (s, 2H), 3.75 (t,  $J$  = 4.8 Hz, 2H), 1.72 (s, 6H);  $^{13}\text{C}$  NMR (125 MHz,  $\text{CDCl}_3$ ):  $\delta$  159.5, 144.5, 134.5, 131.1, 130.9, 130.0, 128.9, 128.0, 127.7, 48.0, 44.0, 26.8, 25.8, 24.7; HRMS calcd for  $\text{C}_{14}\text{H}_{15}\text{ClN}_4\text{O}+\text{H}^+$ : 291.1007, found: 291.1005.

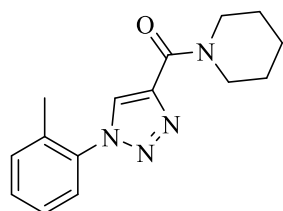

piperidin-1-yl(1-(o-tolyl)-1H-1,2,3-triazol-4-yl) methanone (**4k**)

White solid, yield: 51mg, 19%, m.p.: 111.3-112.0 °C.

$^1\text{H}$  NMR (500 MHz,  $\text{CDCl}_3$ ):  $\delta$  8.24 (s, 1H), 7.45 – 7.42 (m, 1H), 7.39 (d,  $J$  = 7.5 Hz, 1H), 7.35 – 7.33 (m, 2H), 4.24 (s, 2H), 3.75 (t,  $J$  = 5.0 Hz, 2H), 2.24 (s, 3H), 1.73 (s, 6H);  $^{13}\text{C}$  NMR (125 MHz,  $\text{CDCl}_3$ ):  $\delta$  159.7, 144.6, 136.0, 133.7, 131.6, 130.2, 129.6, 127.0, 125.9, 48.0, 44.0, 26.8, 25.8, 24.7, 17.9; HRMS calcd for  $\text{C}_{15}\text{H}_{18}\text{N}_4\text{O}+\text{H}^+$ : 271.1553, found: 271.1557.

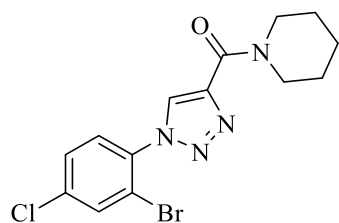

(1-(2-bromo-4-chlorophenyl)-1H-1,2,3-triazol-4-yl) (piperidin-1-yl) methanone (**4l**)

White solid, yield: 291mg, 79%, m.p.: 114.8-115.3 °C.

$^1\text{H}$  NMR (400 MHz,  $\text{CDCl}_3$ ):  $\delta$  8.42 (s, 1H), 7.79 (t,  $J$  = 1.2 Hz, 1H), 7.50 (d,  $J$  = 1.2

Hz, 2H), 4.20 (d,  $J = 4.8$  Hz, 2H), 3.75 (t,  $J = 5.0$  Hz, 2H), 1.73 (s, 6H);  $^{13}\text{C}$  NMR (100 MHz,  $\text{CDCl}_3$ ):  $\delta$  159.4, 144.7, 137.0, 134.8, 133.7, 130.0, 128.9, 128.7, 119.3, 48.0, 44.0, 26.8, 25.8, 24.7; HRMS calcd for  $\text{C}_{14}\text{H}_{14}\text{BrClN}_4\text{O}+\text{H}^+$ : 369.0112, found: 369.0114.

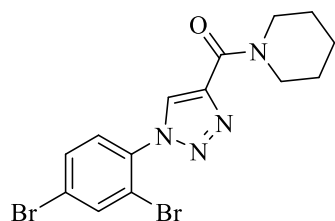

(1-(2,4-dibromophenyl)-1H-1,2,3-triazol-4-yl) (piperidin-1-yl) methanone (**4m**)

White solid, yield: 152mg, 77%, m.p.: 130.2-131.0 °C.

$^1\text{H}$  NMR (400 MHz,  $\text{CDCl}_3$ ):  $\delta$  8.42 (s, 1H), 7.94 (d,  $J = 2.4$  Hz, 1H), 7.64 (dd,  $J = 8.4$ , 2.0 Hz, 1H), 7.43 (d,  $J = 8.4$  Hz, 1H), 4.19 (s, 2H), 3.74 (t,  $J = 4.8$  Hz, 2H), 1.72 (s, 6H);  $^{13}\text{C}$  NMR (100 MHz,  $\text{CDCl}_3$ ):  $\delta$  159.3, 144.7, 136.5, 135.2, 131.9, 130.0, 129.0, 124.8, 119.4, 48.0, 44.0, 26.8, 25.8, 24.7; HRMS calcd for  $\text{C}_{14}\text{H}_{14}\text{Br}_2\text{N}_4\text{O}+\text{H}^+$ : 412.9607, found: 412.9609.

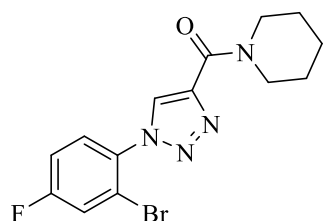

(1-(2-bromo-4-fluorophenyl)-1H-1,2,3-triazol-4-yl) (piperidin-1-yl) methanone (**4n**)

White solid, yield: 162mg, 86%, m.p.: 97.5-98.0 °C.

$^1\text{H}$  NMR (500 MHz,  $\text{CDCl}_3$ ):  $\delta$  8.38 (s, 1H), 7.56 – 7.51 (m, 2H), 7.25 – 7.21 (m, 1H), 4.20 (s, 2H), 3.77 – 3.75 (t,  $J = 5.0$  Hz, 2H), 1.73 (s, 6H);  $^{13}\text{C}$  NMR (125 MHz,  $\text{CDCl}_3$ ):  $\delta$  163.9, 161.8, 159.4, 144.6, 130.2, 129.4 (129.39, 129.31, d,  $J = 10.0$  Hz), 121.3 (121.41, 121.21, d,  $J = 25.0$  Hz), 119.8 (119.84, 119.76, d,  $J = 10.0$  Hz), 115.9 (115.95, 115.77, d,  $J = 22.5$  Hz), 48.0, 44.0, 26.8, 25.8, 24.7; HRMS calcd for  $\text{C}_{14}\text{H}_{14}\text{BrFN}_4\text{O}+\text{H}^+$ : 353.0408, found: 353.0406.

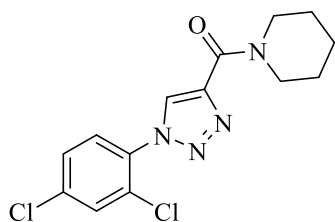

(1-(2,4-dichlorophenyl)-1H-1,2,3-triazol-4-yl) (piperidin-1-yl) methanone (**4o**)

White solid, yield:71mg, 62%, m.p.: 135.8-136.3 °C.

$^1\text{H}$  NMR (400 MHz,  $\text{CDCl}_3$ ):  $\delta$  8.45 (s, 1H), 7.62 (d,  $J = 2.0$  Hz, 1H), 7.57 (d,  $J = 8.4$  Hz, 1H), 7.45 (dd,  $J = 8.4, 2.4$  Hz, 1H), 4.18 (s, 2H), 3.75 (t,  $J = 4.6$  Hz, 2H), 1.73 (s, 6H);  $^{13}\text{C}$  NMR (100 MHz,  $\text{CDCl}_3$ ):  $\delta$  159.3, 144.7, 136.7, 133.1, 130.8, 129.9, 129.6, 128.4, 100.0, 48.0, 44.0, 26.8, 25.8, 24.7; HRMS calcd for  $\text{C}_{14}\text{H}_{14}\text{Cl}_2\text{N}_4\text{O}+\text{H}^+$ : 325.0617, found: 325.0618.

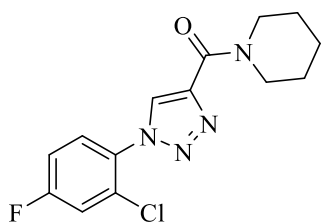

(1-(2-chloro-4-fluorophenyl)-1H-1,2,3-triazol-4-yl) (piperidin-1-yl) methanone (**4p**)

White solid, yield:117mg, 78%, m.p.: 141.3-141.8 °C.

$^1\text{H}$  NMR (400 MHz,  $\text{CDCl}_3$ ):  $\delta$  8.42 (s, 1H), 7.60 (dd,  $J = 8.8, 5.2$  Hz, 1H), 7.35 (dd,  $J = 8.0, 2.8$  Hz, 1H), 7.21 -7.16 (m, 1H), 4.19 (s, 2H), 3.74 (t,  $J = 4.6$  Hz, 2H), 1.72 (s, 6H);  $^{13}\text{C}$  NMR (100 MHz,  $\text{CDCl}_3$ ):  $\delta$  164.1, 161.6, 159.4, 144.7, 130.4 (130.46, 130.35, d,  $J = 11.0$  Hz), 130.1, 129.1 (129.13, 129.04, d,  $J = 9.0$  Hz), 118.4 (118.40, 118.14, d,  $J = 26.0$  Hz), 115.4 (115.52, 115.29, d,  $J = 23.0$  Hz), 48.0, 44.0, 26.8, 25.8, 24.7; HRMS calcd for  $\text{C}_{14}\text{H}_{14}\text{ClFN}_4\text{O}+\text{H}^+$ : 309.0913, found: 309.0911.

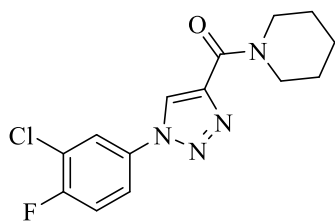

(1-(3-chloro-4-fluorophenyl)-1H-1,2,3-triazol-4-yl) (piperidin-1-yl) methanone (**4q**)

White solid, yield:293mg, 95%, m.p.: 163.4-164.1 °C.

For the gram-scale reaction of 4-azido-2-chloro-1-fluorobenzene (**1q**, 1 g, 5.85 mmol), HFO-1233zd (*E*) and piperidine under the standard reaction condition afforded product **4q** in 70% yield.

<sup>1</sup>H NMR (500 MHz, CDCl<sub>3</sub>): δ 8.45 (s, 1H), 7.89 (dd, *J* = 6.5, 3.0 Hz, 1H), 7.65 – 7.62 (m, 1H), 7.33 (t, *J* = 8.5 Hz, 1H), 4.17 (d, *J* = 5.0 Hz, 2H), 3.74 (t, *J* = 5.0 Hz, 2H), 1.72 (t, *J* = 8.5 Hz, 6H); <sup>13</sup>C NMR (125 MHz, CDCl<sub>3</sub>): δ 159.3, 157.3, 145.7, 133.1, 126.1, 123.3, 122.8 (122.91, 122.76, d, *J* = 18.8 Hz), 120.4 (120.43, 120.37, d, *J* = 7.5 Hz), 117.8 (117.91, 117.72, d, *J* = 23.8 Hz), 48.0, 44.0, 26.8, 25.8, 24.6; HRMS calcd for C<sub>14</sub>H<sub>14</sub>ClFN<sub>4</sub>O+H<sup>+</sup>: 309.0913, found: 309.0911.

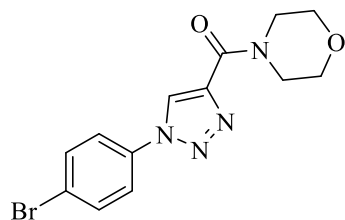

(1-(4-bromophenyl)-1H-1,2,3-triazol-4-yl) (morpholino)methanone (**4r**)

White solid, yield:239mg, 71%, m.p.: 213.4-214.1 °C.

<sup>1</sup>H NMR (400 MHz, CDCl<sub>3</sub>): δ 8.52 (s, 1H), 7.71 – 7.68 (m, 2H), 7.66 – 7.64 (m, 2H), 4.40 – 4.38 (m, 2H), 3.81 (d, *J* = 8.8 Hz, 6H); <sup>13</sup>C NMR (100 MHz, CDCl<sub>3</sub>): δ 159.4, 145.1, 135.4, 133.2, 126.4, 123.2, 122.1 67.3, 66.9, 47.4, 43.2; HRMS calcd for C<sub>13</sub>H<sub>13</sub>BrN<sub>4</sub>O<sub>2</sub>+H<sup>+</sup>: 337.0295, found: 337.0294.

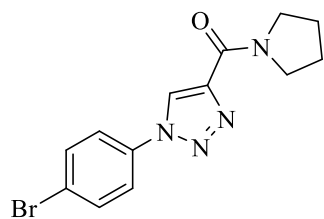

(1-(4-bromophenyl)-1H-1,2,3-triazol-4-yl) (pyrrolidin-1-yl) methanone (**4s**)

White solid, yield:163mg, 51%, m.p.: 218.6-219.3 °C.

<sup>1</sup>H NMR (500 MHz, CDCl<sub>3</sub>): δ 8.55 (s, 1H), 7.70 -7.65 (m, 4H), 4.16 (t, *J* = 7.0 Hz, 2H), 3.70 (t, *J* = 7.0 Hz, 2H), 2.04 (p, *J* = 6.5 Hz, 2H), 1.94 (p, *J* = 6.5 Hz, 2H); <sup>13</sup>C

NMR (125 MHz, CDCl<sub>3</sub>):  $\delta$  159.1, 146.0, 135.6, 133.1, 125.5, 123.0, 122.0, 48.8, 47.1, 26.6, 23.8; HRMS calcd for C<sub>13</sub>H<sub>13</sub>BrN<sub>4</sub>O+H<sup>+</sup>: 321.0346, found: 321.0348.

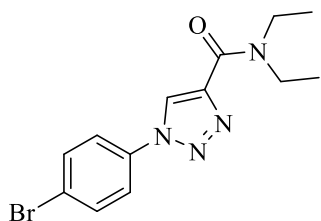

1-(4-bromophenyl)-*N,N*-diethyl-1H-1,2,3-triazole-4-carboxamide (**4t**)

White solid, yield:164mg, 51%, m.p.: 182.2-183.0 °C.

<sup>1</sup>H NMR (500 MHz, CDCl<sub>3</sub>):  $\delta$  8.51 (s, 1H), 7.69 - 7.64 (m, 4H), 4.01 (q, *J* = 7.0 Hz, 2H), 3.57 (q, *J* = 7.0 Hz, 2H), 1.35 (t, *J* = 7.0 Hz, 3H), 1.26 (t, *J* = 7.0 Hz, 3H); <sup>13</sup>C NMR (125 MHz, CDCl<sub>3</sub>):  $\delta$  160.1, 145.9, 135.6, 133.1, 126.0, 123.0, 122.0, 43.1, 41.4, 14.8, 12.8; HRMS calcd for C<sub>13</sub>H<sub>15</sub>BrN<sub>4</sub>O+H<sup>+</sup>: 323.0502, found: 323.0505.

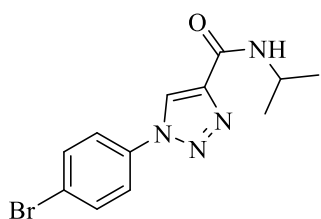

1-(4-bromophenyl)-*N*-isopropyl-1H-1,2,3-triazole-4-carboxamide (**4u**)

White solid, yield:77mg, 25%, m.p.: 217.6-218.1 °C.

<sup>1</sup>H NMR (500 MHz, CDCl<sub>3</sub>):  $\delta$  8.48 (s, 1H), 7.70 - 7.68 (m, 2H), 7.65 - 7.63 (m, 2H), 7.03 (d, *J* = 7.0 Hz, 1H), 4.34 - 4.27 (m, 1H), 1.30 (d, *J* = 6.5 Hz, 6H); <sup>13</sup>C NMR (125 MHz, CDCl<sub>3</sub>):  $\delta$  158.8, 144.4, 135.6, 133.1, 126.4, 123.2, 122.1, 41.4, 22.8; HRMS calcd for C<sub>12</sub>H<sub>13</sub>BrN<sub>4</sub>O+H<sup>+</sup>: 309.0346, found: 309.0343.

## 2. Optimization of reaction conditions<sup>a</sup>

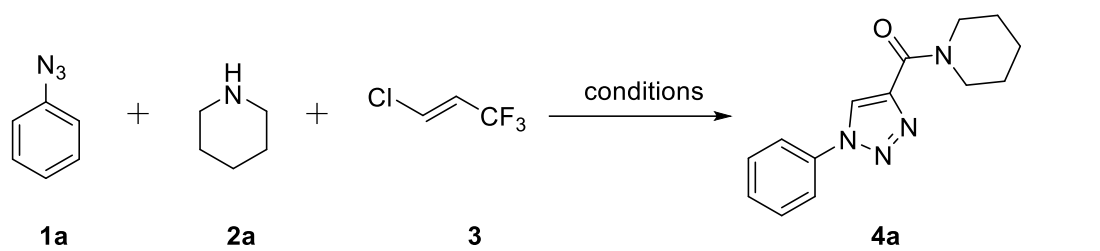

| Entry | Additive   | Base              | Temp (°C) | Yield (%) |
|-------|------------|-------------------|-----------|-----------|
| 1     | /          | LiOH              | 50        | Trace     |
| 2     | /          | /                 | 50        | Trace     |
| 3     | /          | DABCO             | 50        | 9         |
| 4     | /          | DBU               | 50        | 3         |
| 5     | /          | Et <sub>3</sub> N | 50        | 4         |
| 6     | /          | DMAP              | 50        | 6         |
| 7     | /          | DMA               | 50        | 8         |
| 8     | /          | DIPEA             | 50        | 10        |
| 9     | /          | DABCO             | 80        | 13        |
| 10    | /          | DIPEA             | 80        | 14        |
| 11    | TPGS-750-M | DABCO             | 80        | 16        |
| 12    | TPGS-750-M | DIPEA             | 80        | 22        |
| 13    | TPGS-750-M | DABCO             | 100       | 33        |
| 14    | TPGS-750-M | DIPEA             | 100       | 38        |
| 15    | 18-crown-6 | DABCO             | 100       | 36        |
| 16    | 18-crown-6 | DIPEA             | 100       | 42        |
| 17    | TBAHS      | DABCO             | 100       | 28        |
| 18    | TBAHS      | DIPEA             | 100       | 31        |
| 19    | TPGS-750-M | DABCO             | 120       | 35        |
| 20    | TPGS-750-M | DIPEA             | 120       | 43        |
| 21    | 18-crown-6 | DABCO             | 120       | 44        |
| 22    | 18-crown-6 | DIPEA             | 120       | 52        |

|    |            |       |     |    |
|----|------------|-------|-----|----|
| 23 | TBAHS      | DABCO | 120 | 38 |
| 24 | TBAHS      | DIPEA | 120 | 42 |
| 25 | 18-crown-6 | DABCO | 140 | 46 |
| 26 | 18-crown-6 | DIPEA | 140 | 68 |
| 27 | 18-crown-6 | DMAP  | 140 | 38 |
| 28 | 18-crown-6 | DMA   | 140 | 50 |
| 29 | 18-crown-6 | DIPEA | 150 | 65 |
| 30 | 18-crown-6 | DIPEA | 150 | 67 |

<sup>a</sup>Reaction conditions unless otherwise specified: **1a** (1.0 mmol), **2a** (5.0 mmol), **3** (2.0 mL), base (3.0 mmol), additive (1.0 mmol), 2.0 mL of solvent (THF/H<sub>2</sub>O=3:1), 4 days in the Schlenk tube, Isolated yields. TPGS-750-M: Poly(oxy-1,2-ethanediyl),  $\alpha$ -[4-[[3,4-dihydro-2,5,7,8-tetramethyl-2-(4,8,12-trimethyltridecyl)-2H-1-benzopyran-6-yl]oxy]-1,4-dioxobutyl]- $\omega$ -methoxy-Polymer. TBAHS: Tetrabutylammonium hydrogen sulfate.  
<sup>b</sup>5.0 mmol of DIPEA was used.

### 3. $^1\text{H}$ and $^{13}\text{C}$ NMR Spectra for 4 and 5

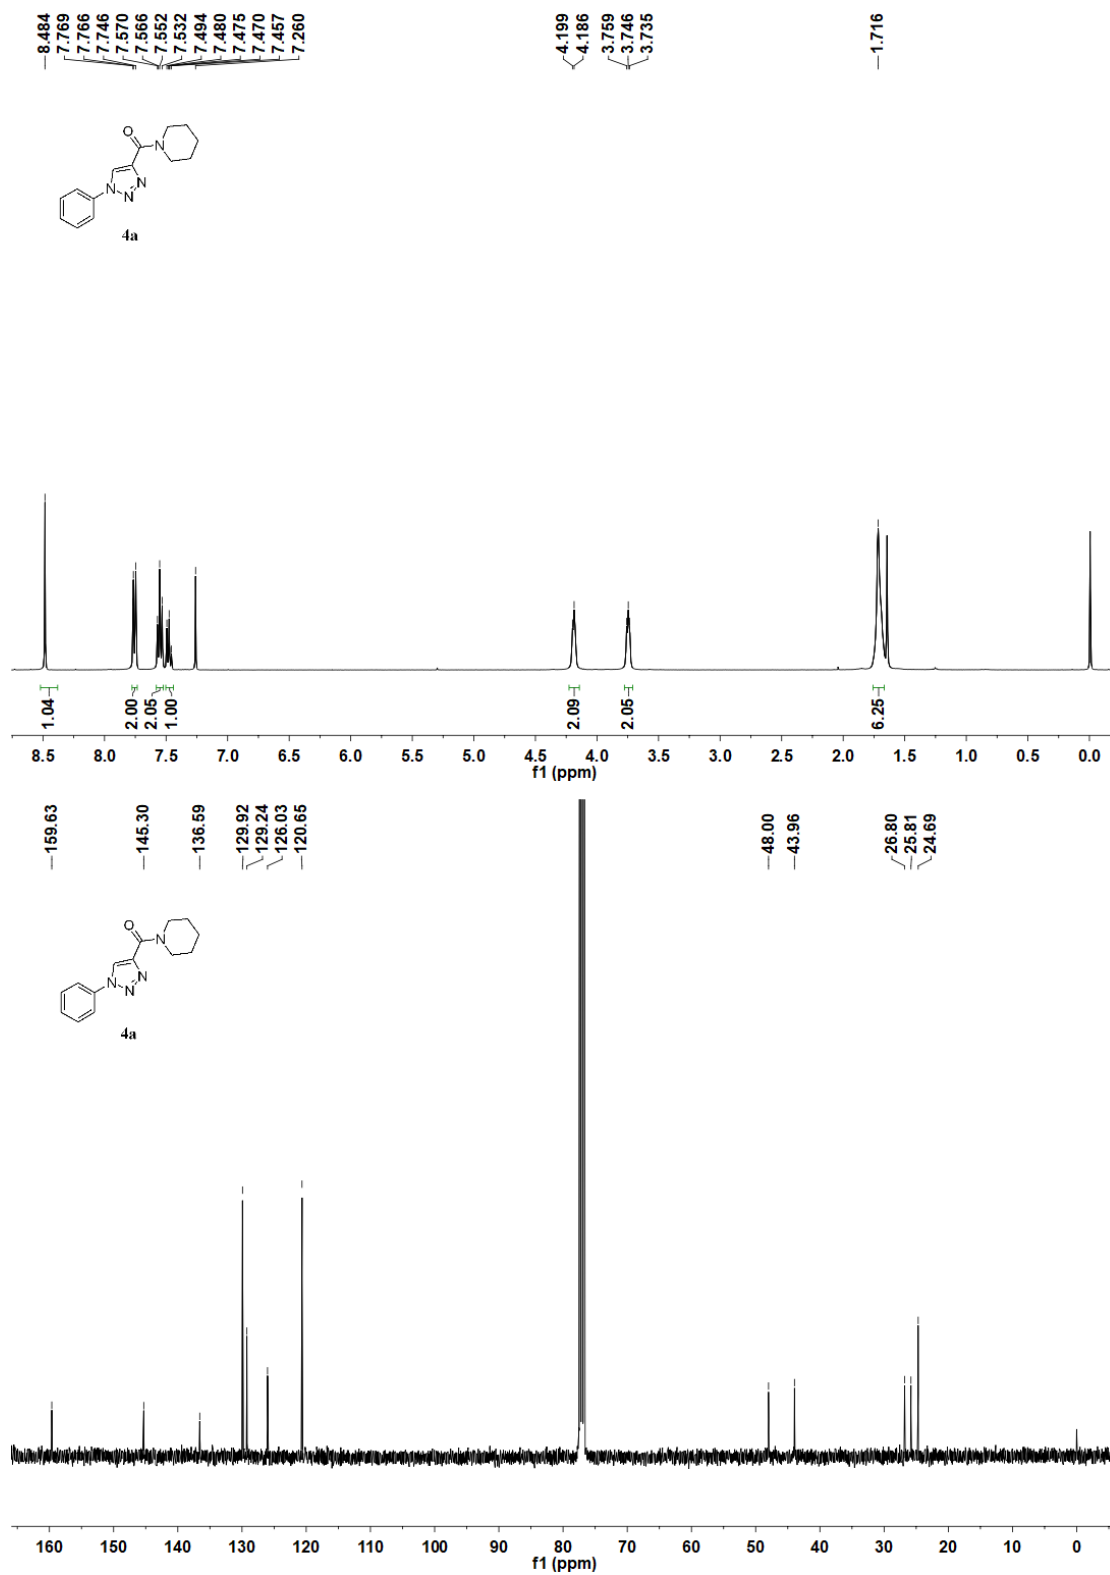



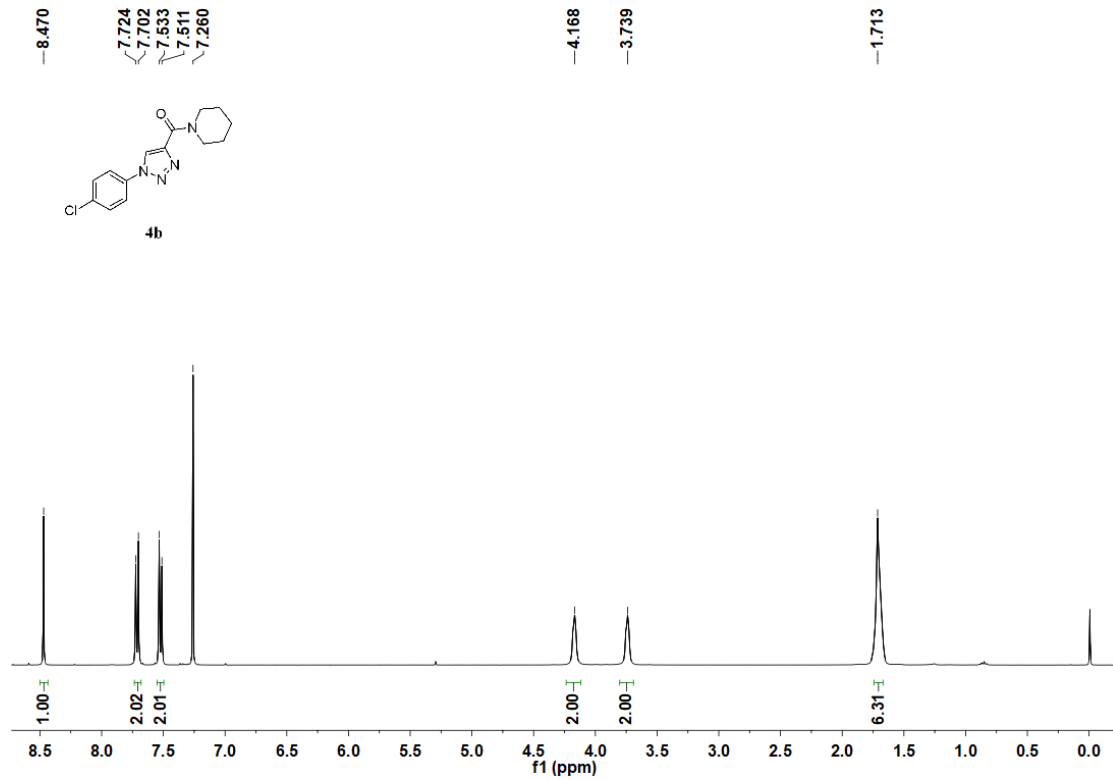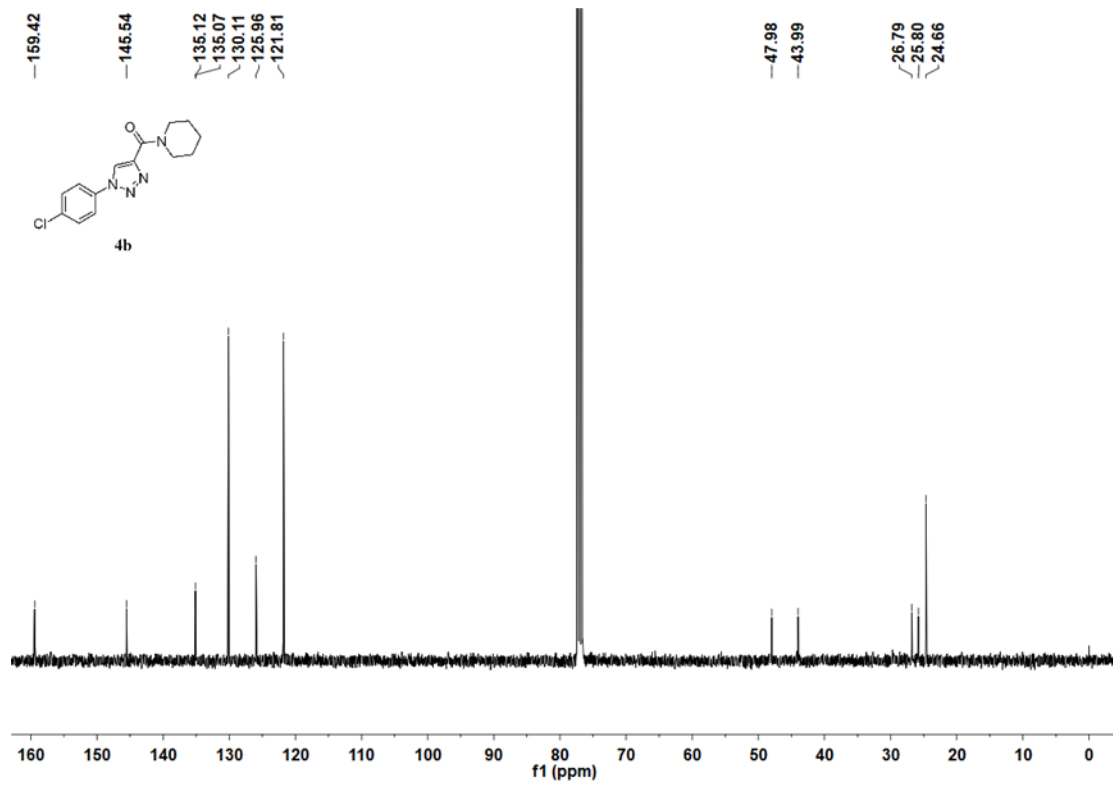

8.467  
7.696  
7.680  
7.674  
7.659  
7.653  
7.636

4.181  
4.167  
3.753  
3.740  
3.729

1.714

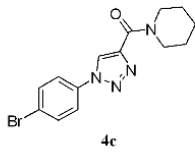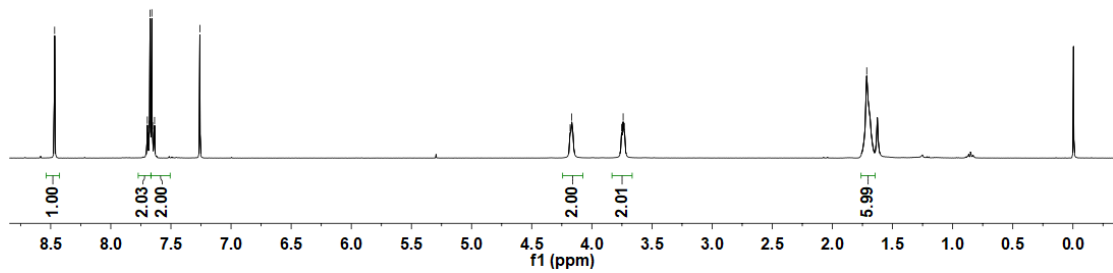

159.40  
145.59  
135.55  
133.09  
125.88  
123.00  
122.03

47.97  
43.98

26.79  
25.80  
24.66

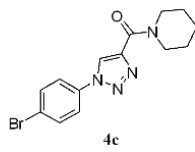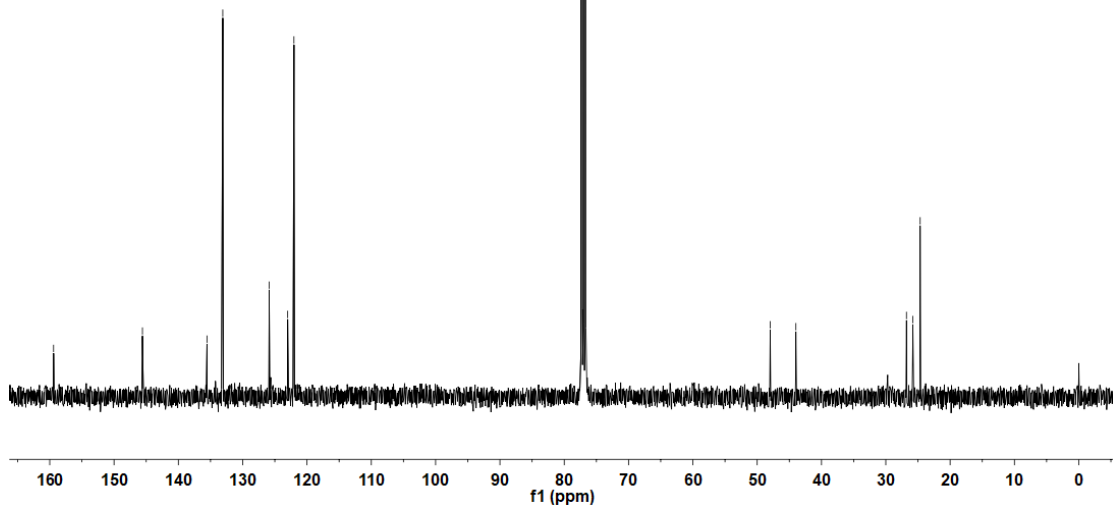

8.440  
7.749  
7.740  
7.735  
7.731  
7.280  
7.244  
7.230  
7.226

4.186  
4.177  
3.752  
3.741

1.717  
1.701

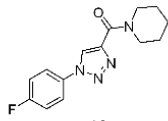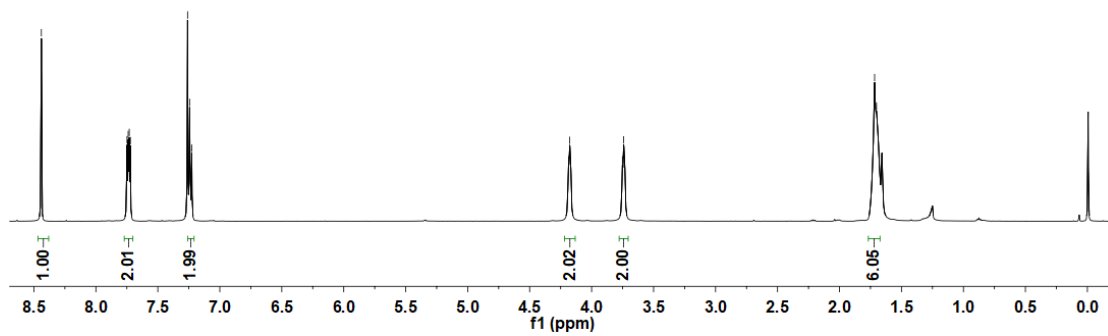

163.71  
161.72  
159.49  
145.46  
126.18  
122.72  
122.65  
117.01  
116.83

47.97  
43.97

26.79  
25.80  
24.67

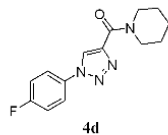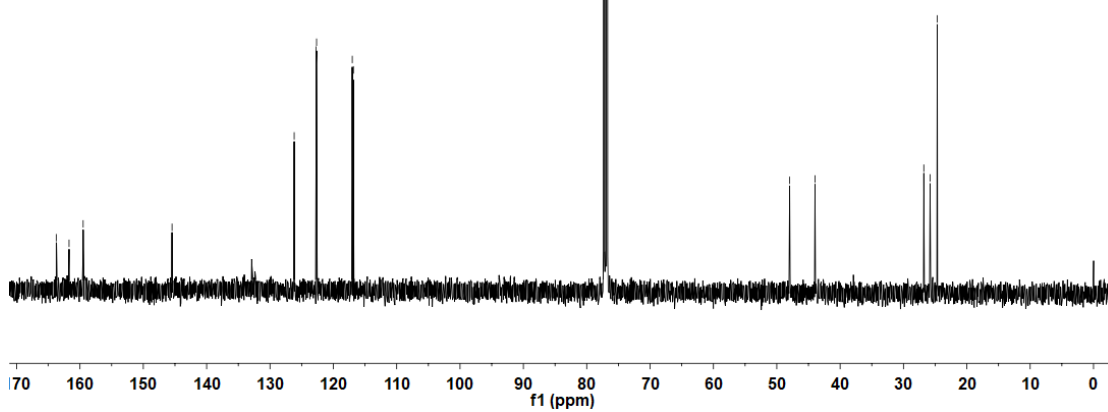

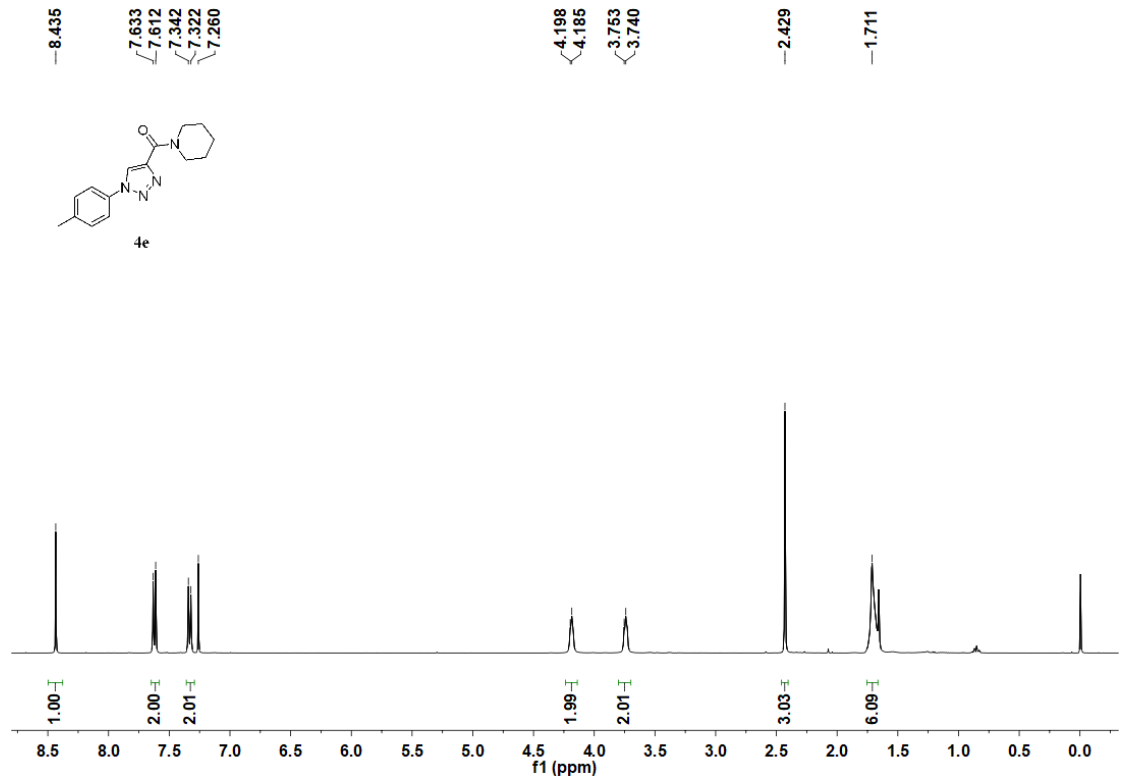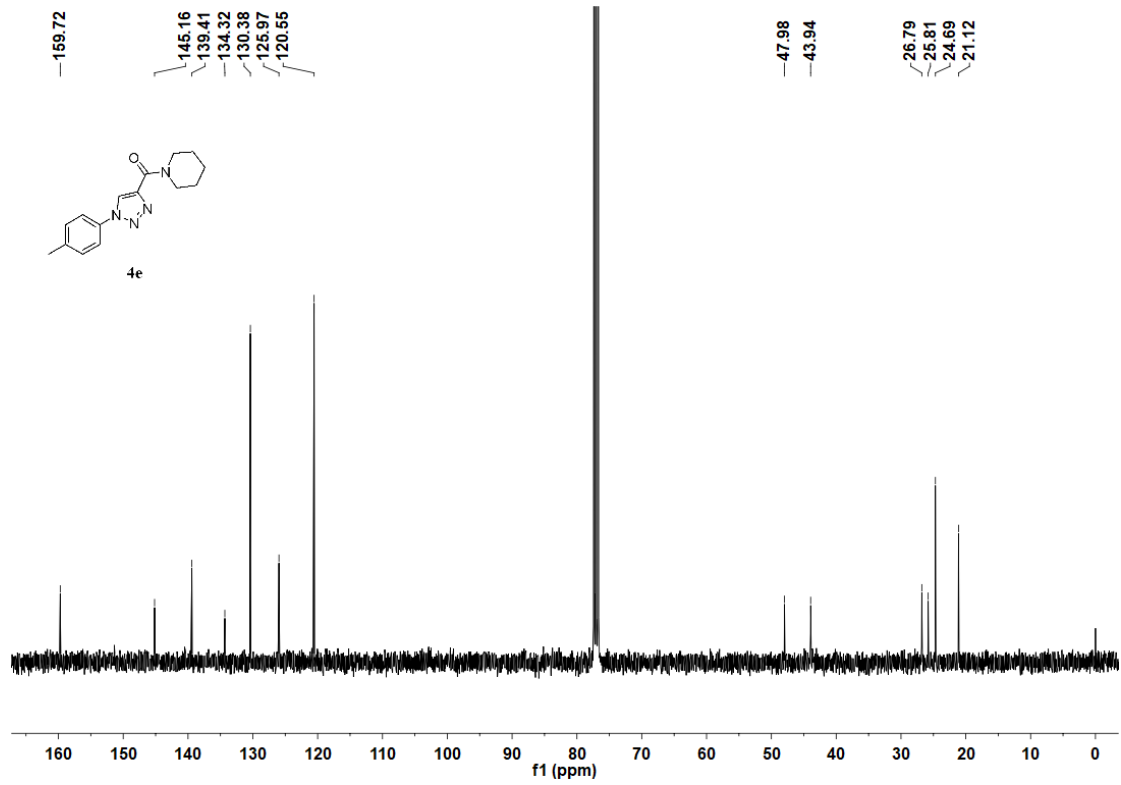

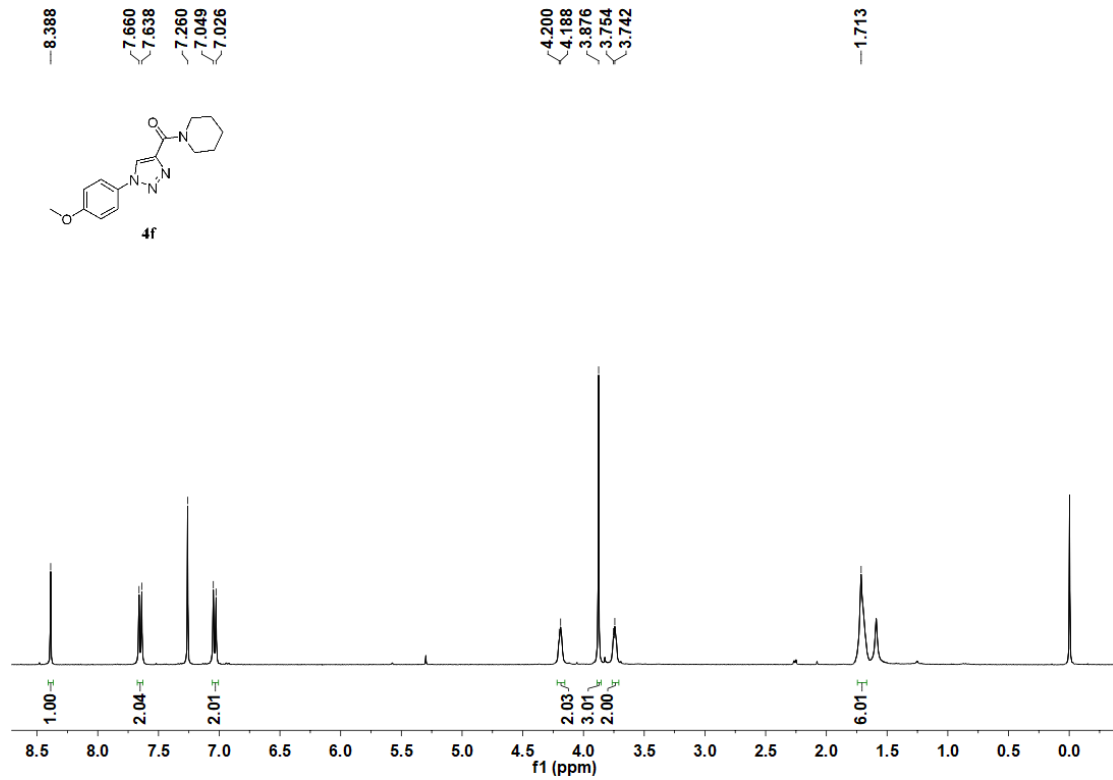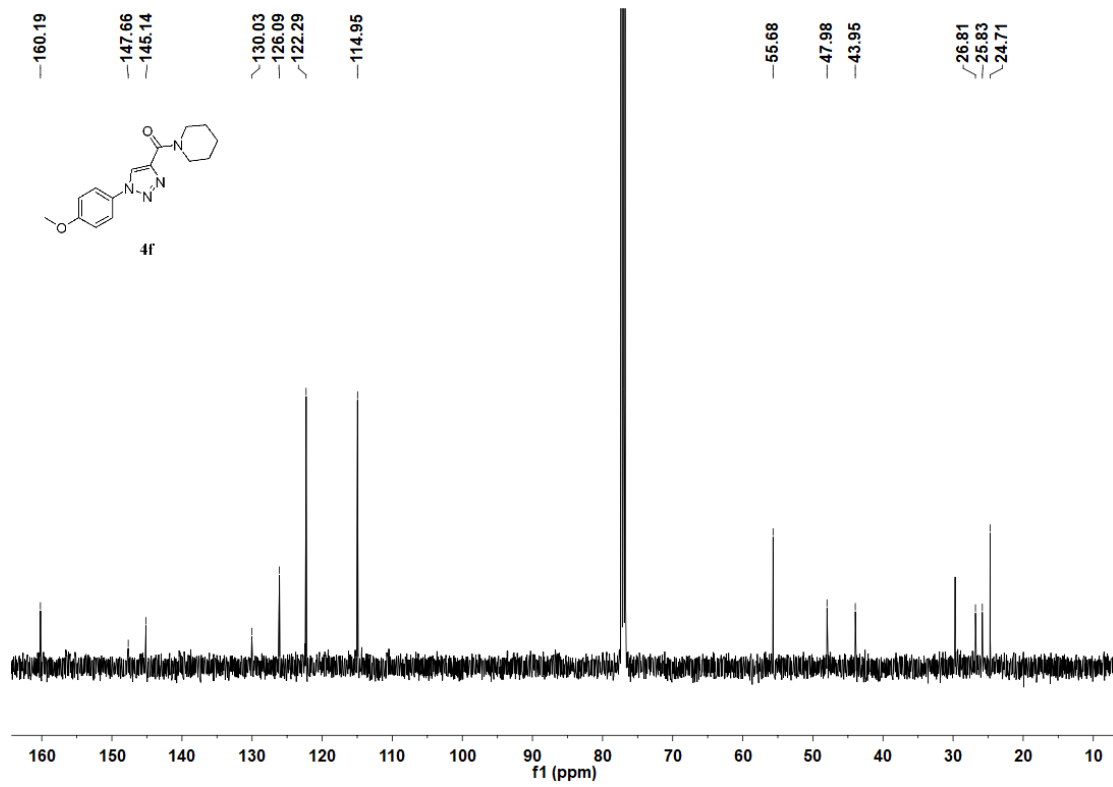

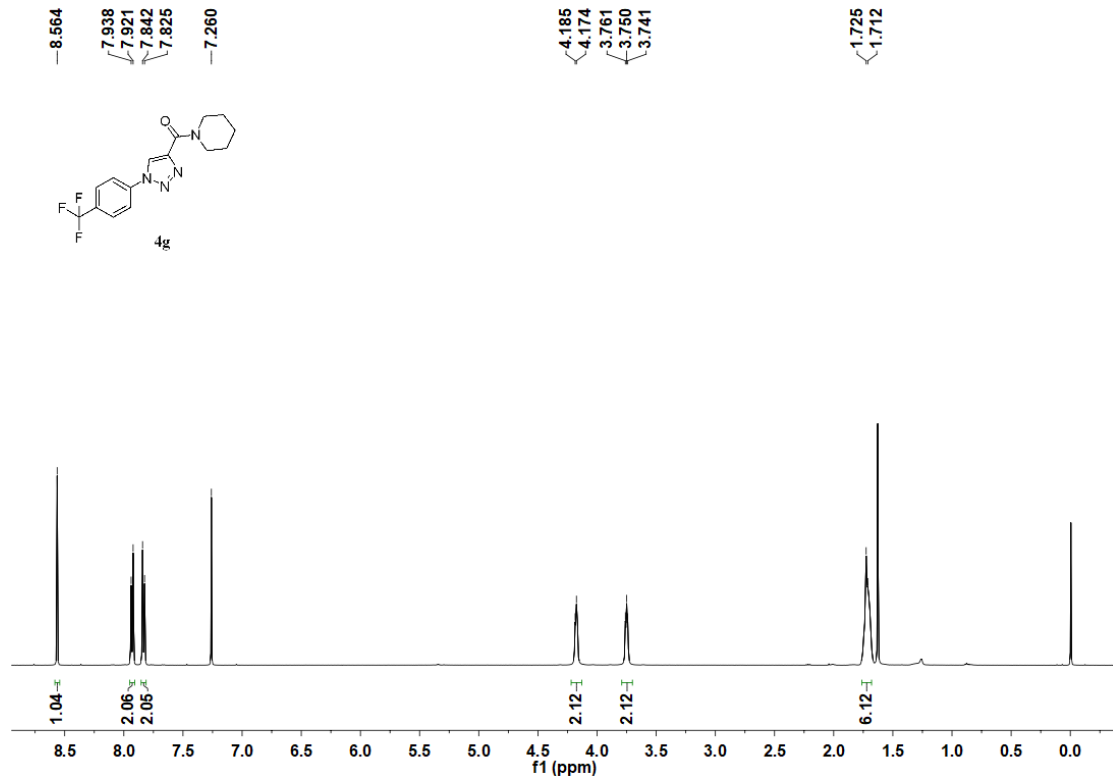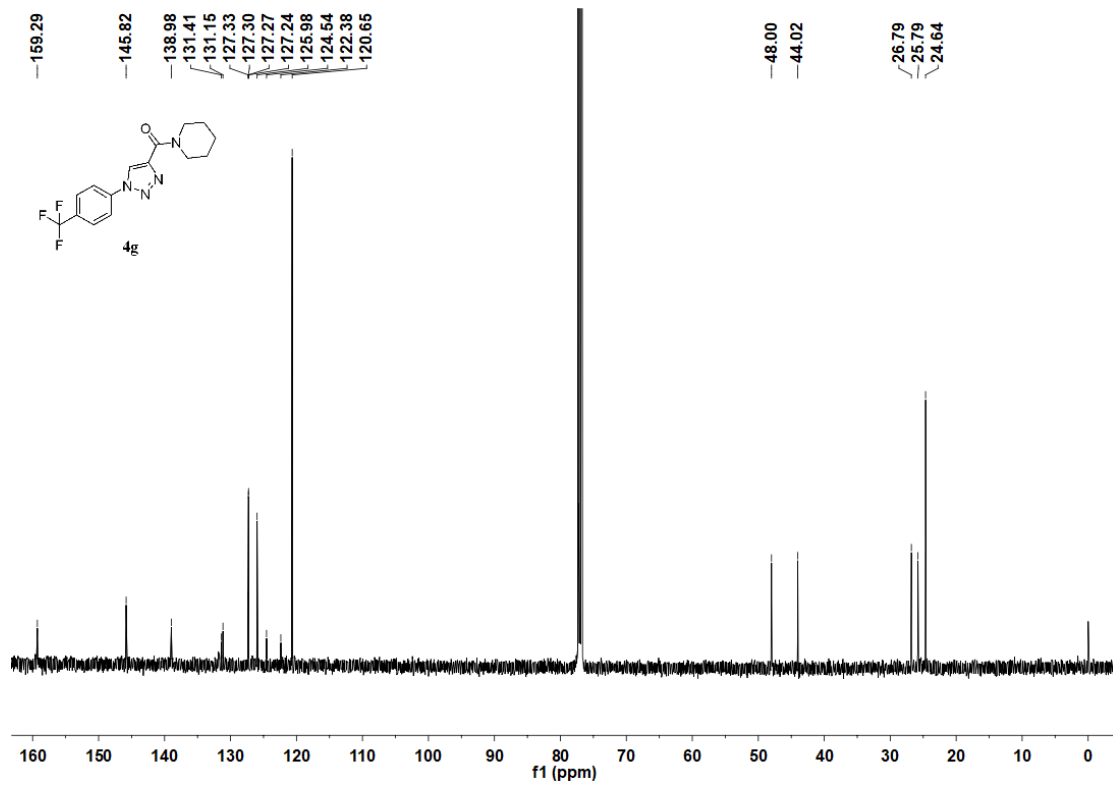

8.483  
7.830  
7.825  
7.820  
7.660  
7.655  
7.651  
7.641  
7.637  
7.632  
7.509  
7.489  
7.470  
7.466  
7.461  
7.458  
7.445  
7.441  
7.260

4.178  
4.165  
3.756  
3.743  
3.732

-1.717

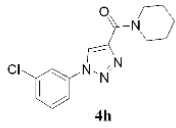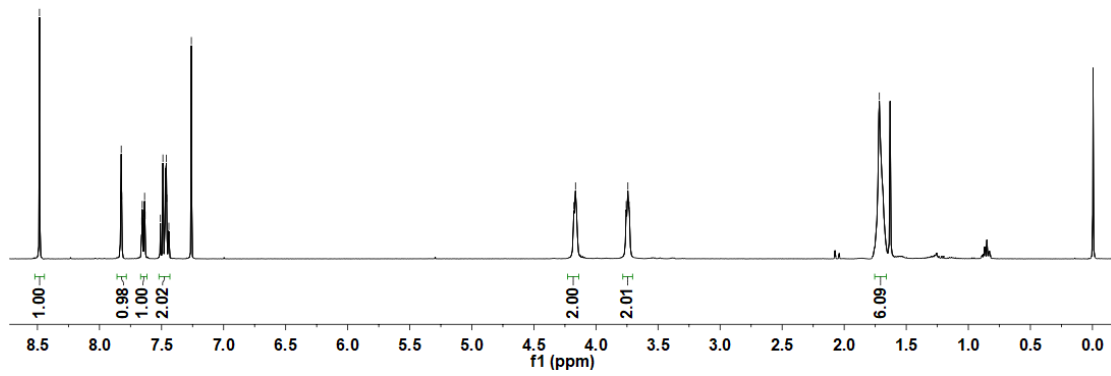

159.38  
145.58  
137.45  
135.82  
130.98  
129.33  
125.99  
121.03  
118.58  
47.99  
43.99  
26.79  
25.80  
24.67

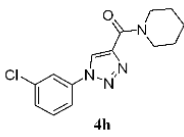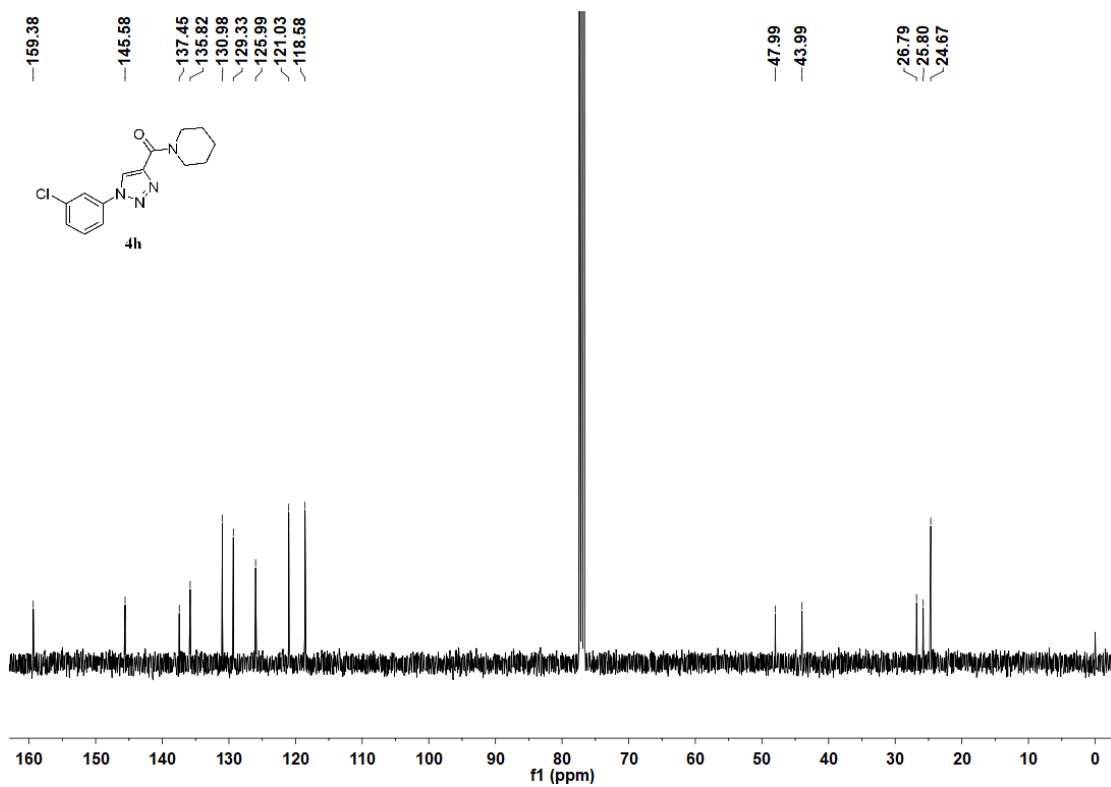

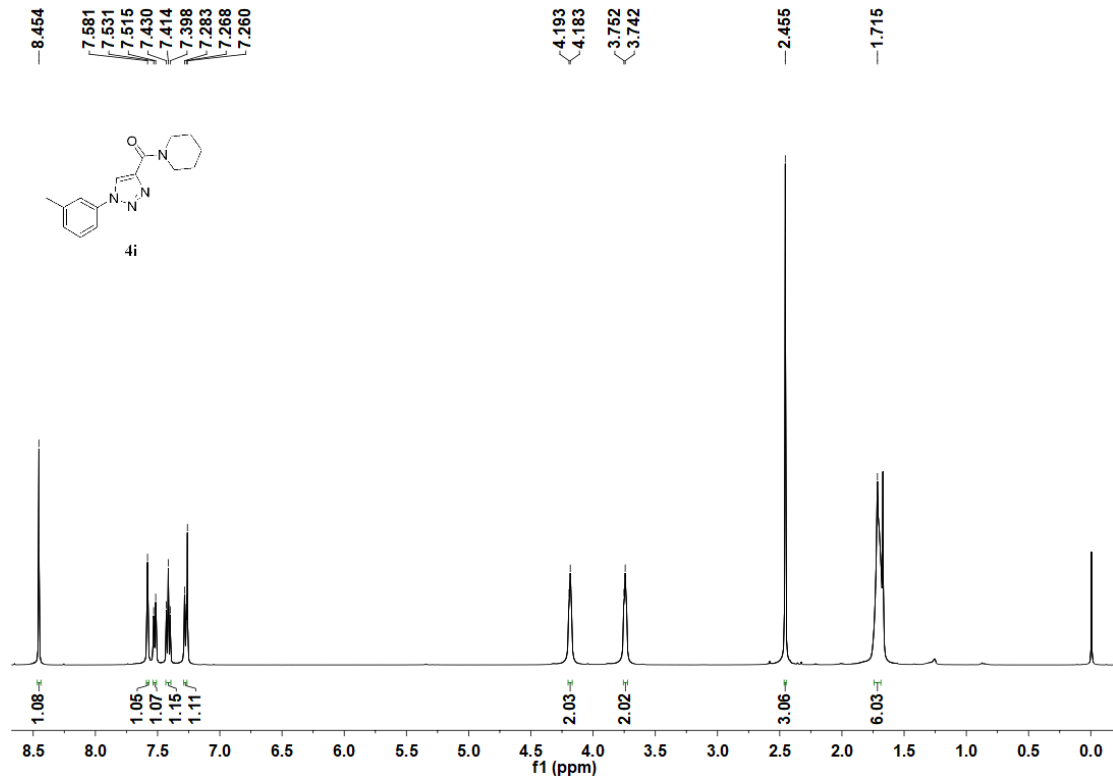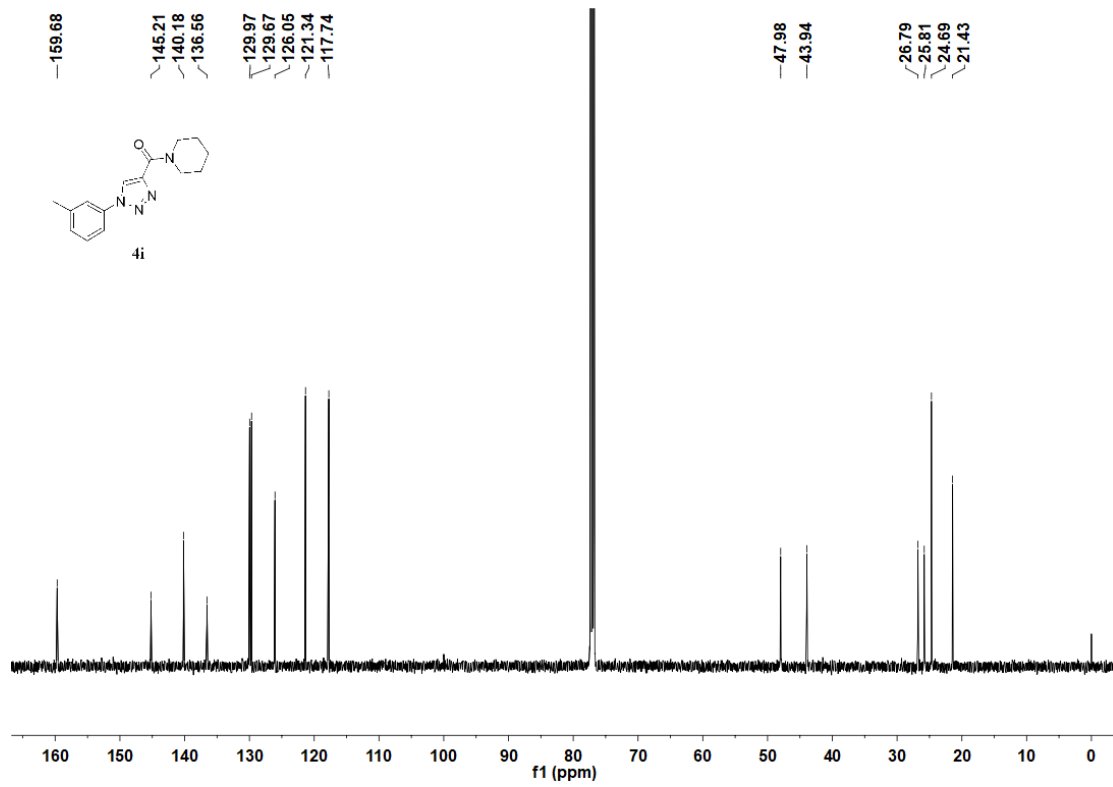



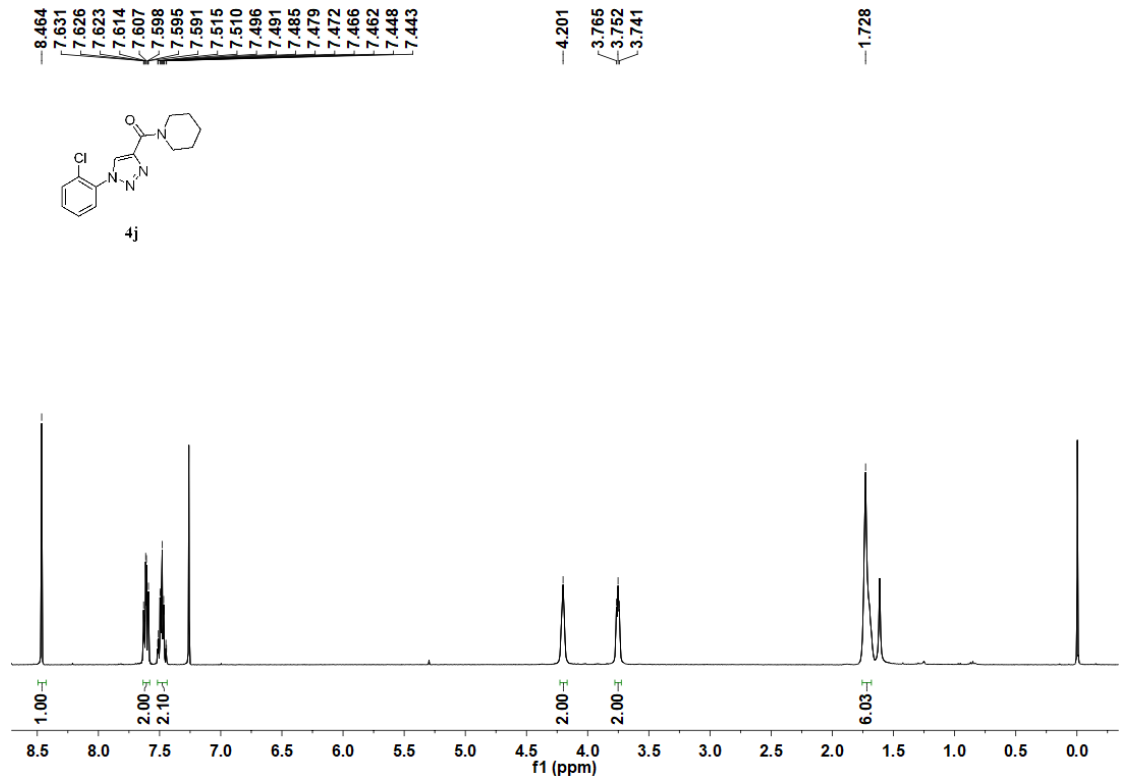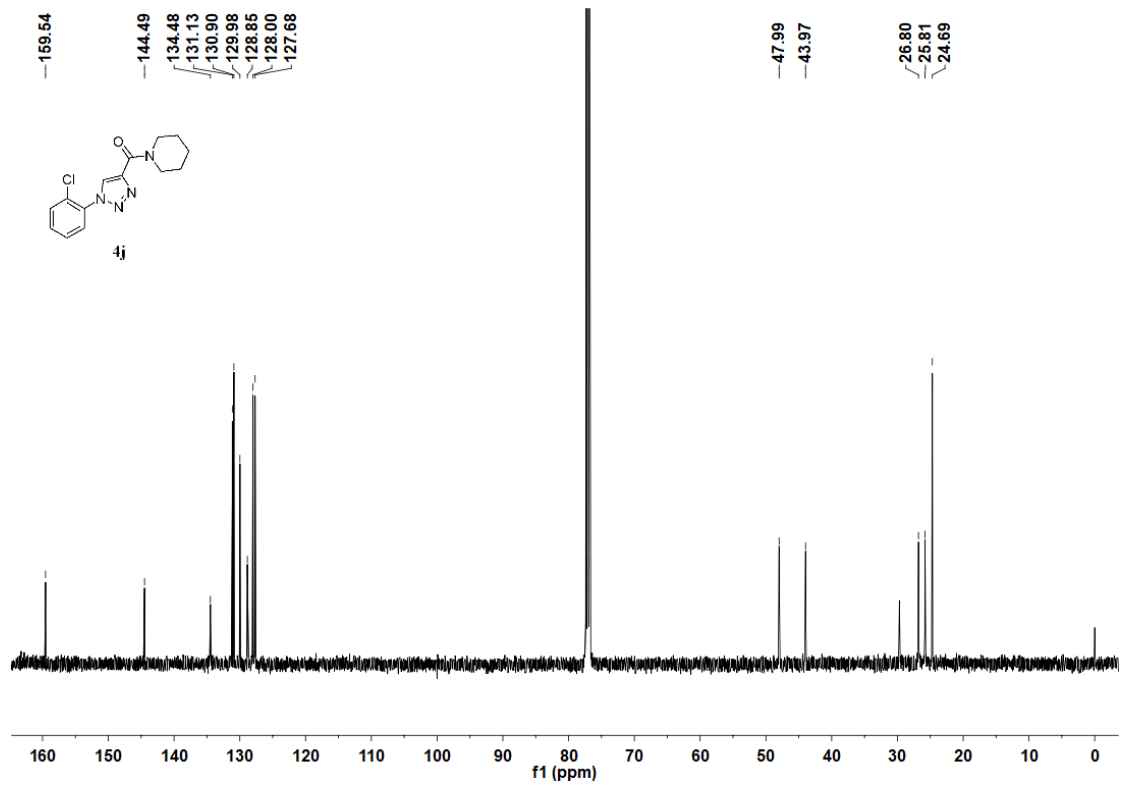

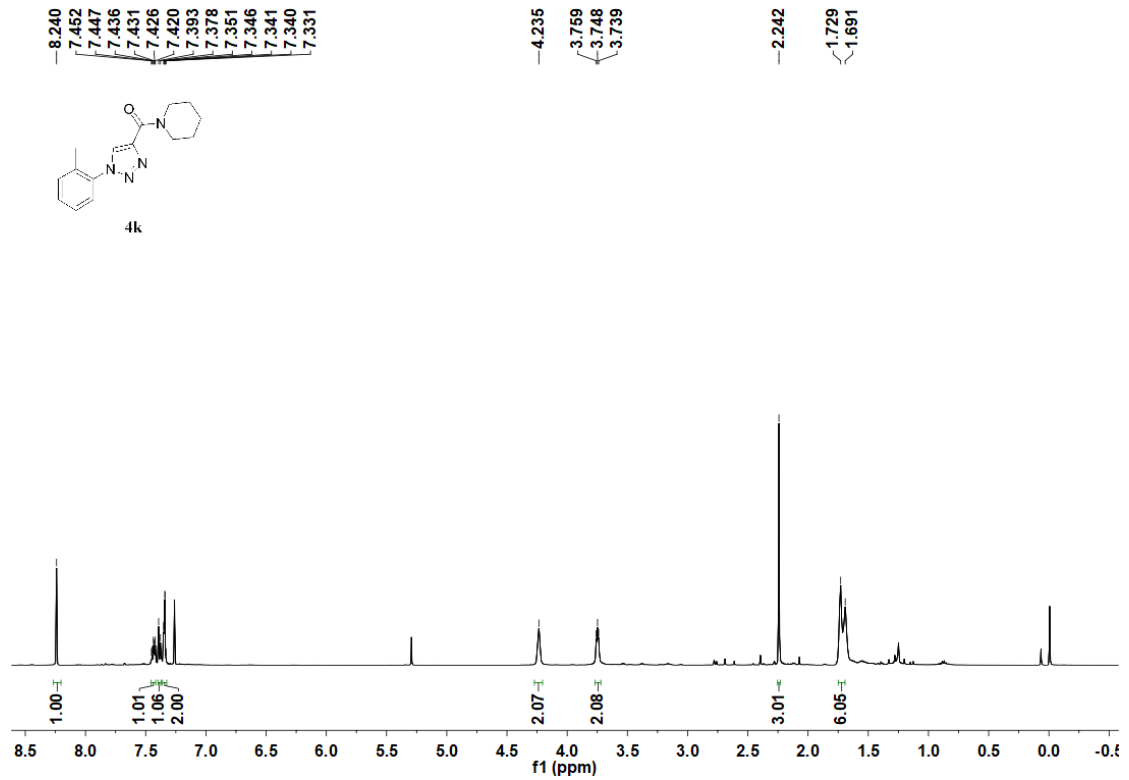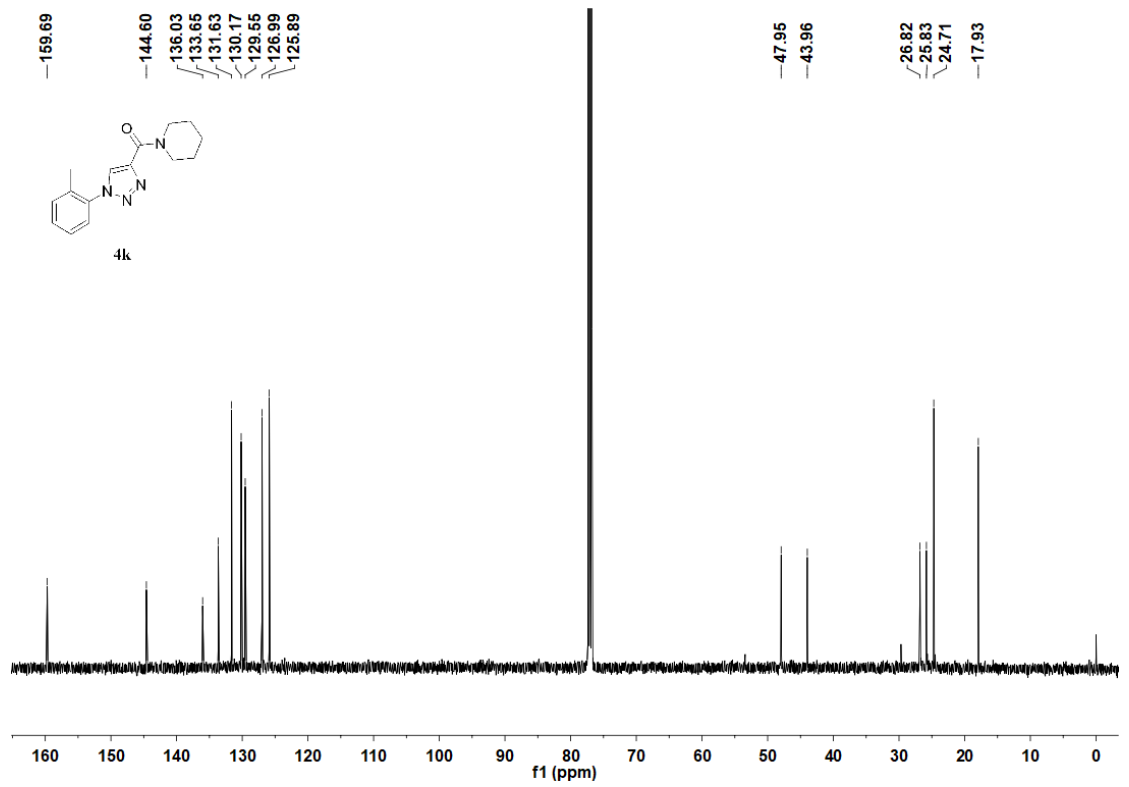

8.416  
7.794  
7.791  
7.788  
7.499  
7.496  
7.260

4.202  
4.190  
3.761  
3.747  
3.736

1.726

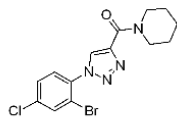

4l

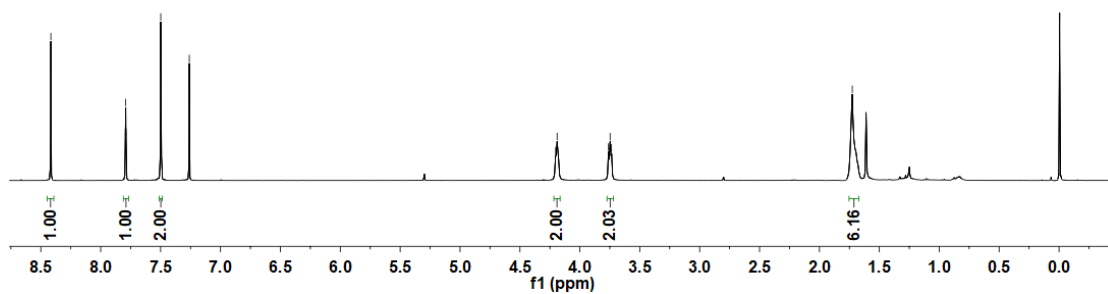

159.36  
144.67  
137.04  
134.77  
133.73  
130.01  
128.90  
128.71  
119.26  
47.97  
43.98  
26.78  
25.79  
24.67

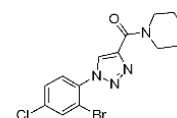

4l

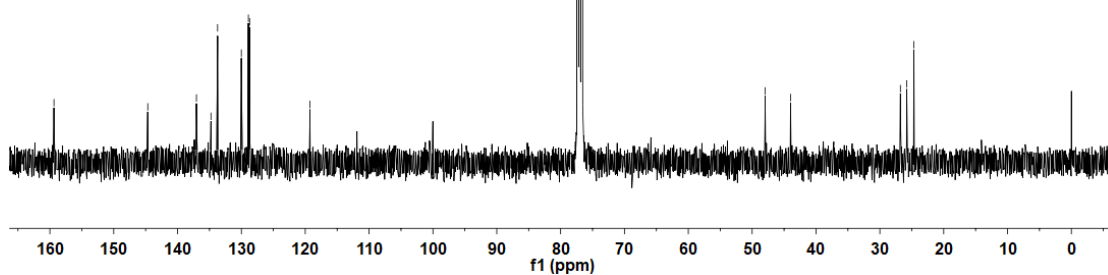

8.418  
7.947  
7.941  
7.658  
7.653  
7.637  
7.632  
7.439  
7.418  
7.260

4.186  
3.758  
3.744  
3.734

1.724

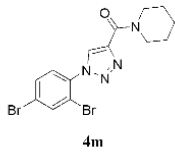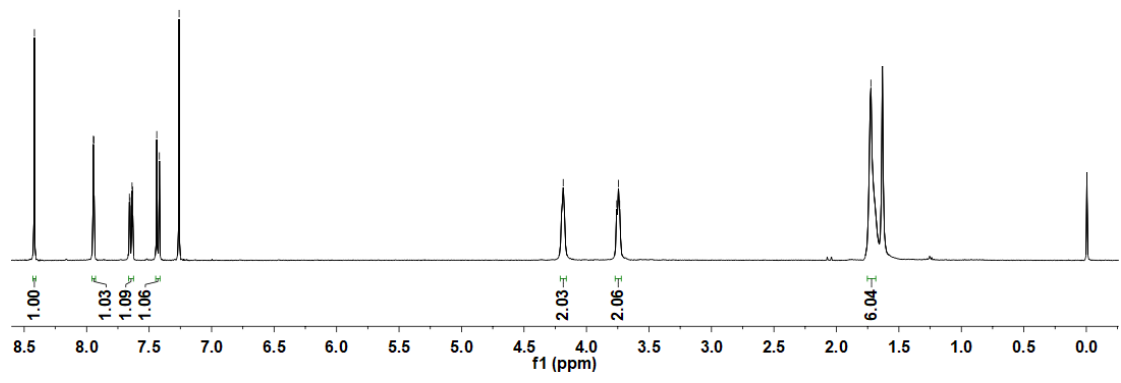

159.34  
144.66  
136.50  
135.21  
131.88  
129.95  
128.96  
124.82  
119.44

47.97  
43.98  
26.78  
25.79  
24.66

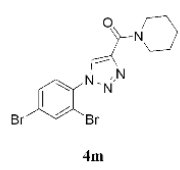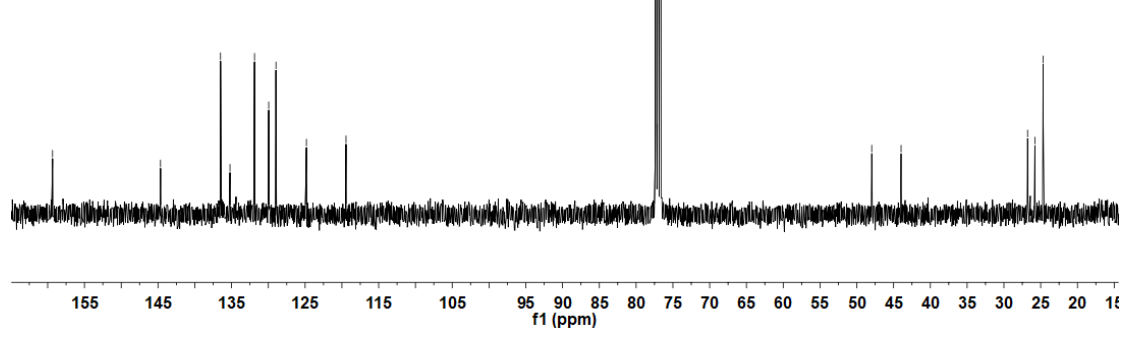

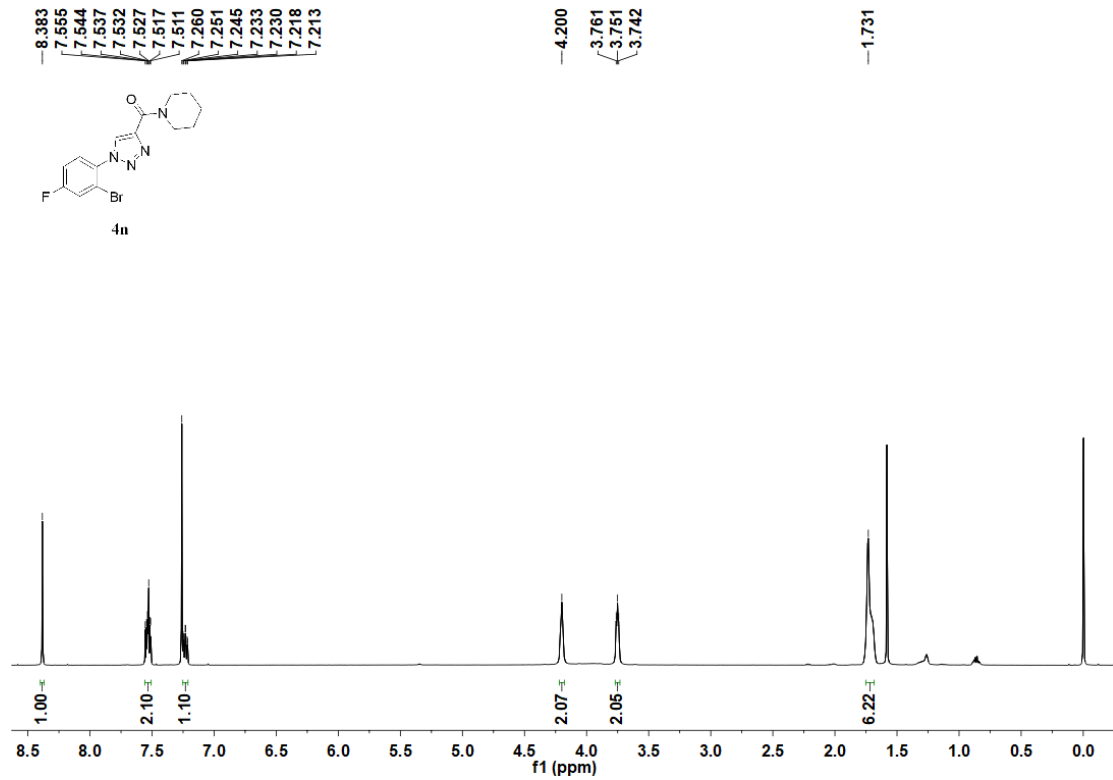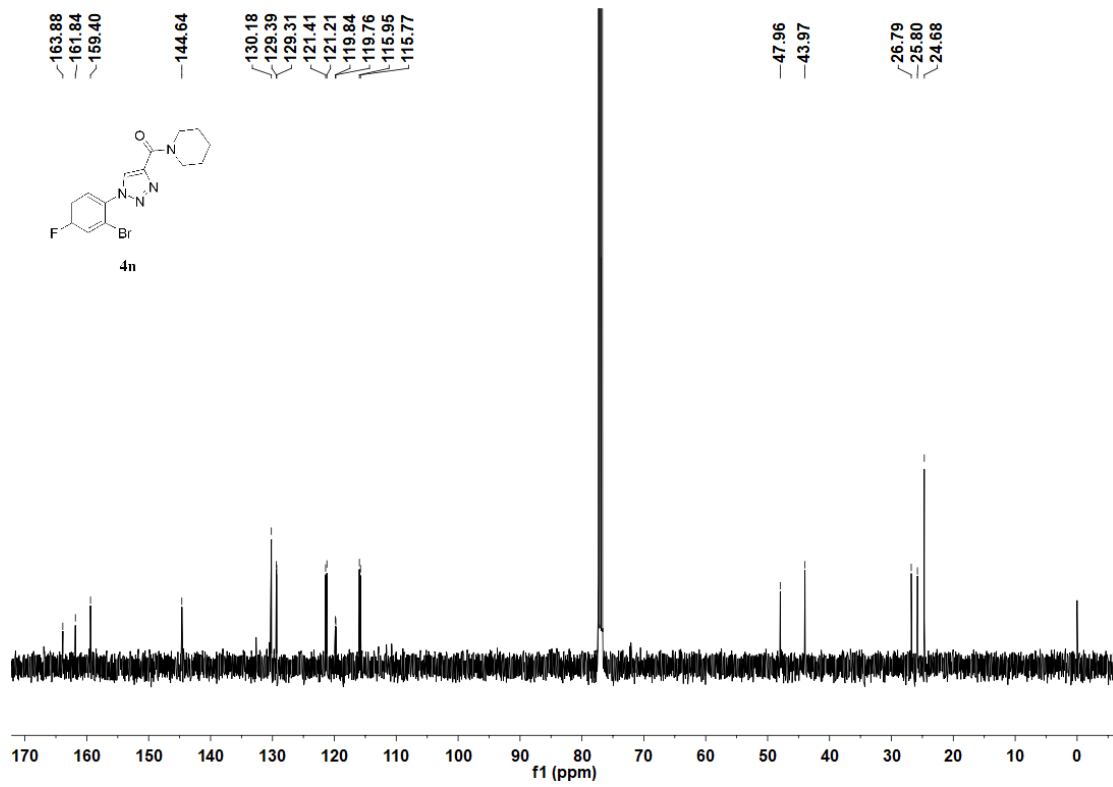

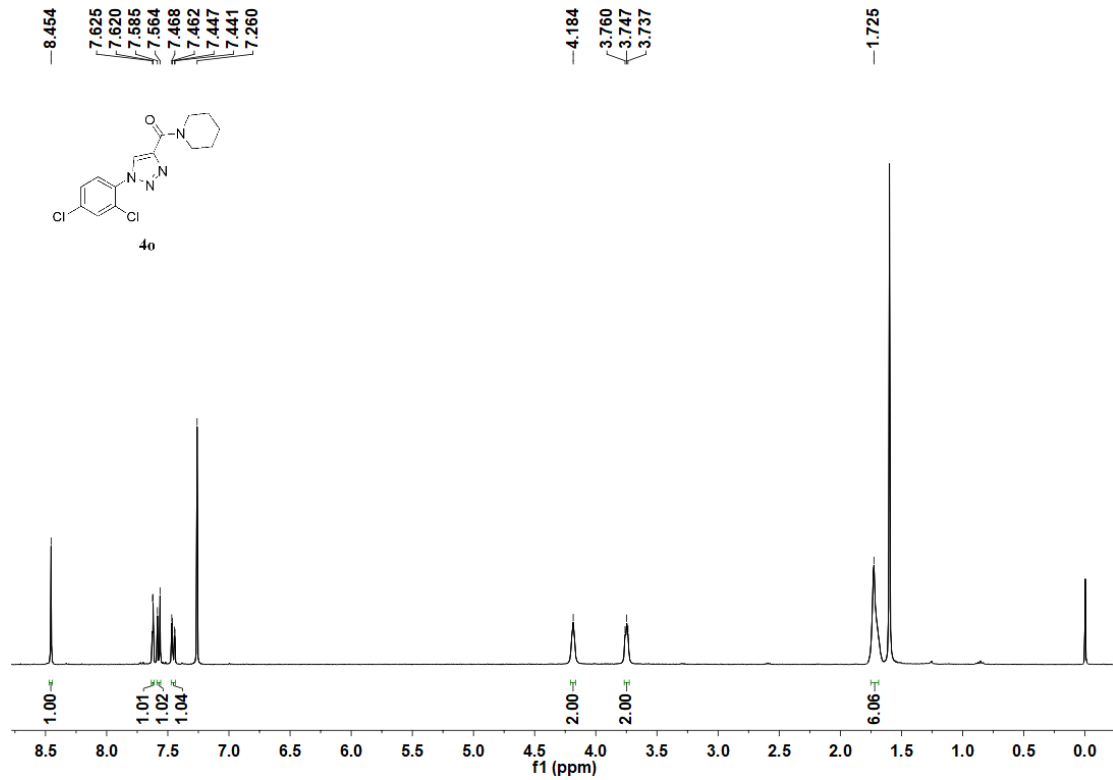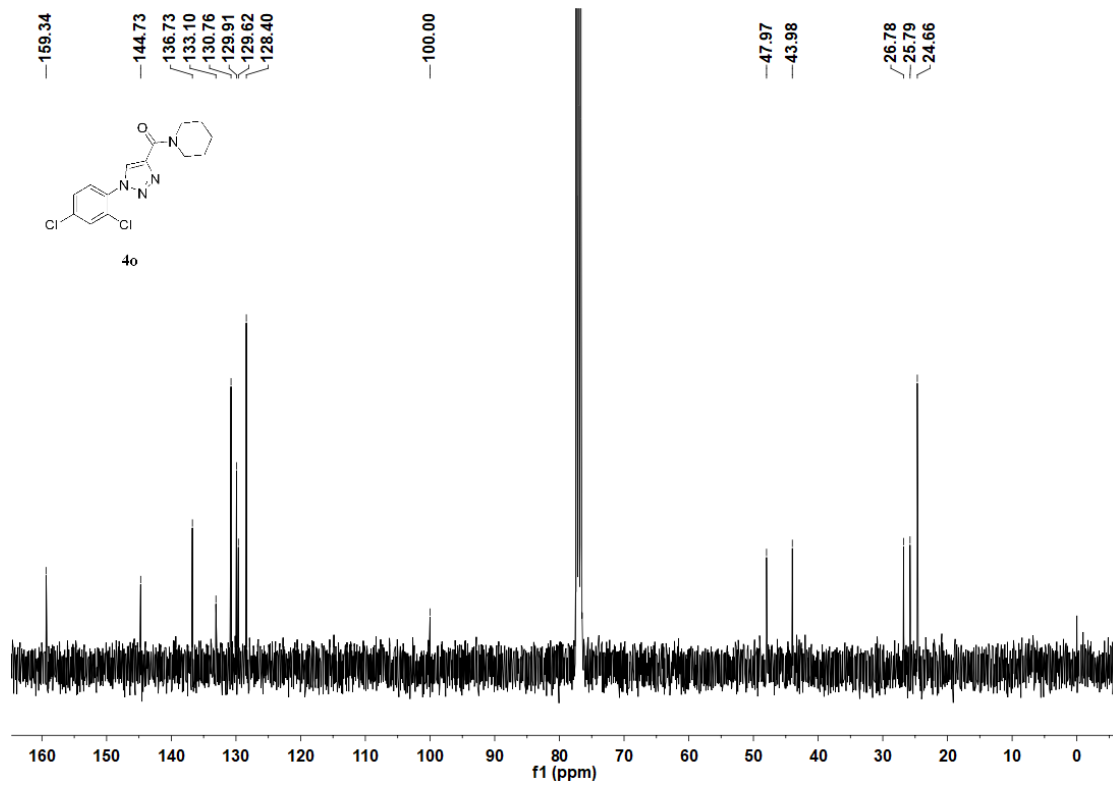

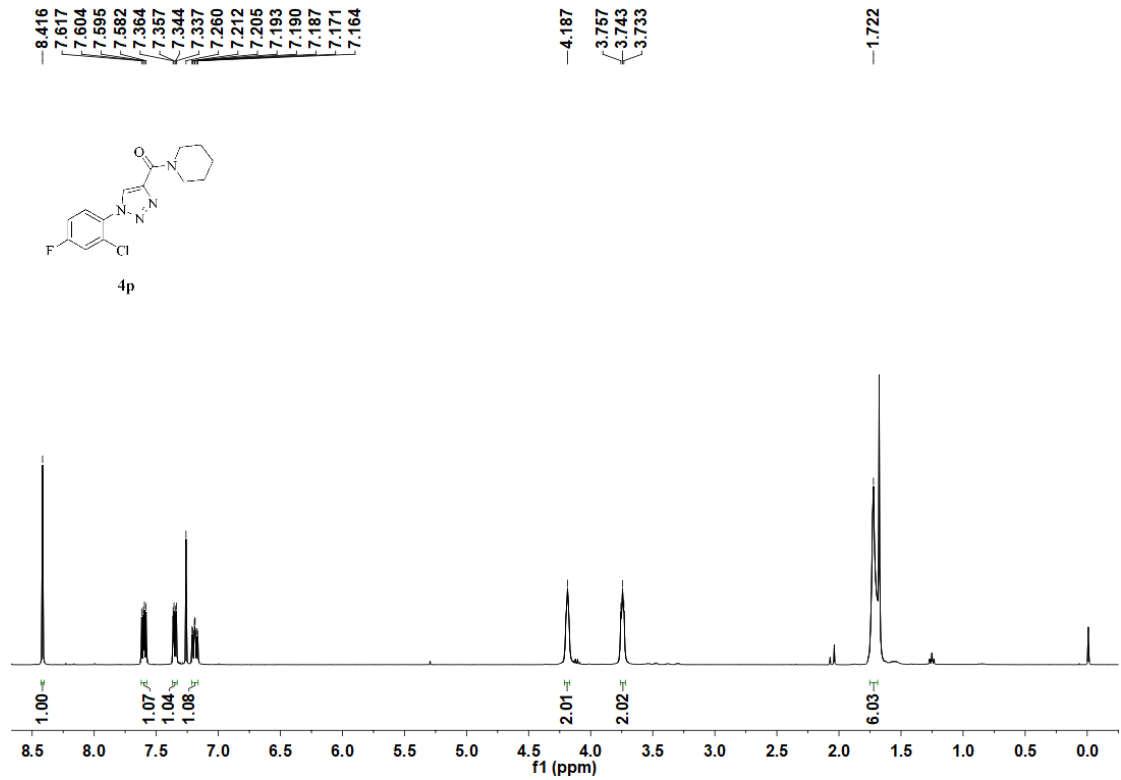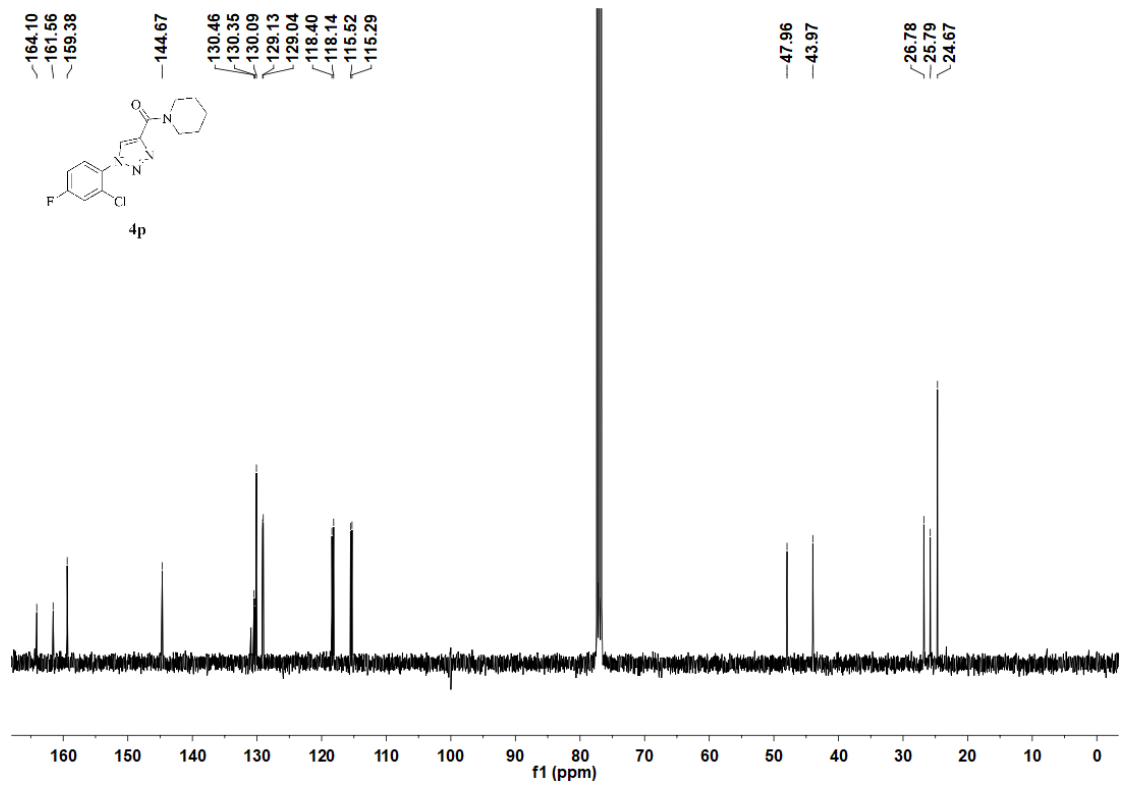

8.453  
7.895  
7.889  
7.882  
7.877  
7.654  
7.647  
7.641  
7.636  
7.630  
7.623  
7.348  
7.331  
7.314  
7.260

4.170  
4.160  
3.752  
3.741  
3.732

1.736  
1.719  
1.702

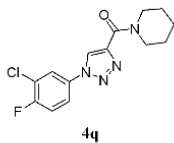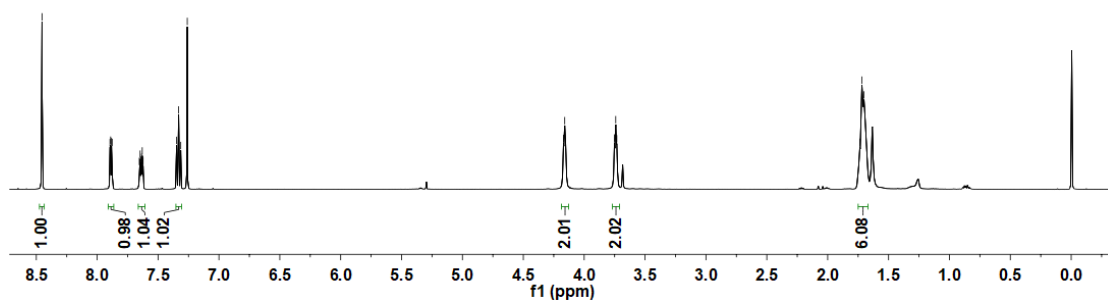

159.27  
157.27  
145.68  
133.14  
126.13  
123.33  
122.91  
122.76  
120.43  
120.37  
117.91  
117.72  
47.98  
44.00  
26.78  
25.79  
24.64

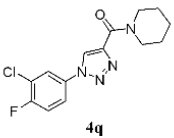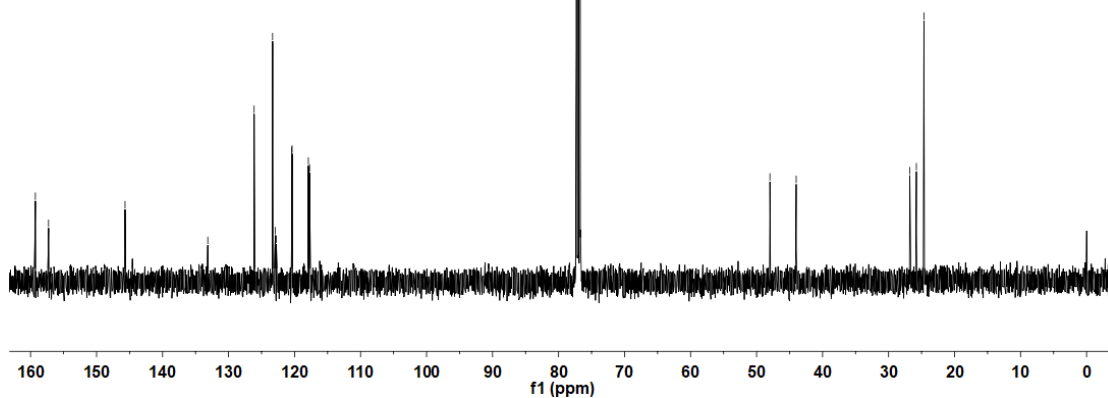



8.515  
7.711  
7.705  
7.694  
7.688  
7.683  
7.659  
7.654  
7.642  
7.637

4.403  
4.391  
4.380  
3.818  
3.796

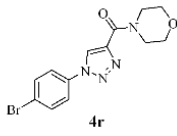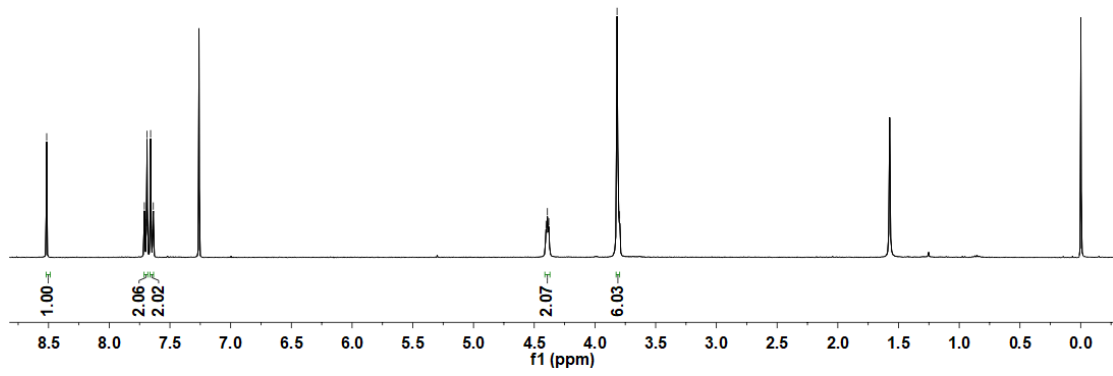

159.41  
145.05  
135.39  
133.16  
126.41  
123.24  
122.07

67.25  
66.92  
47.38  
43.16

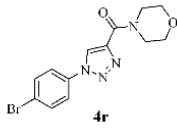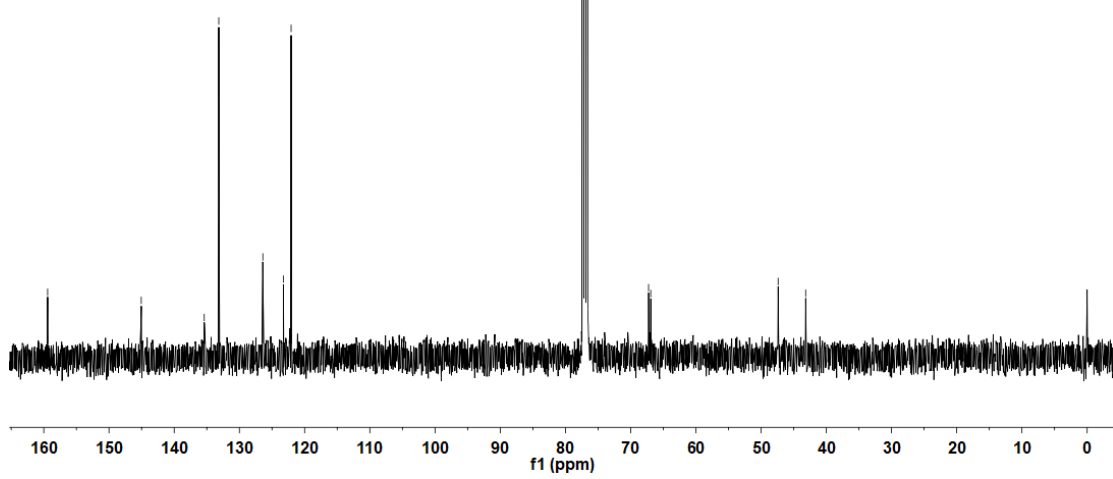

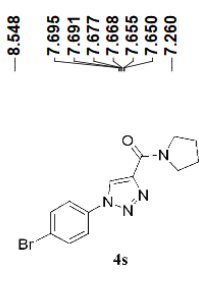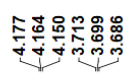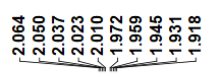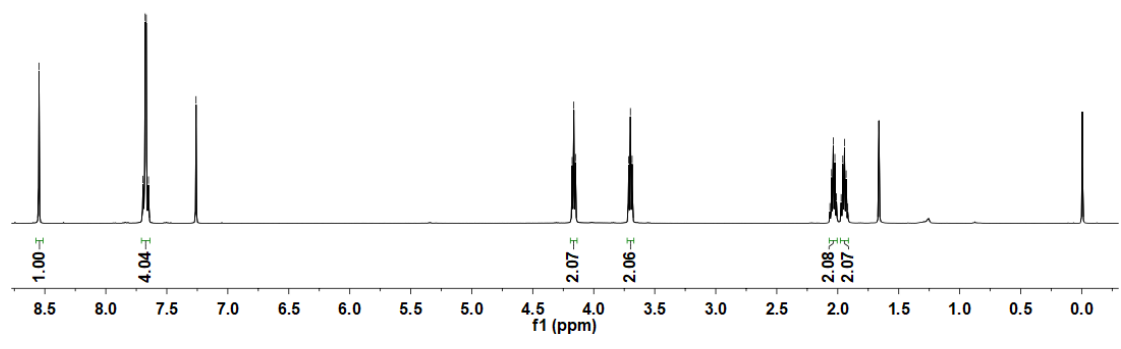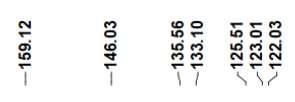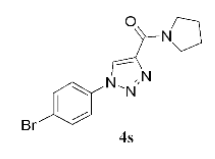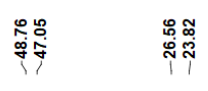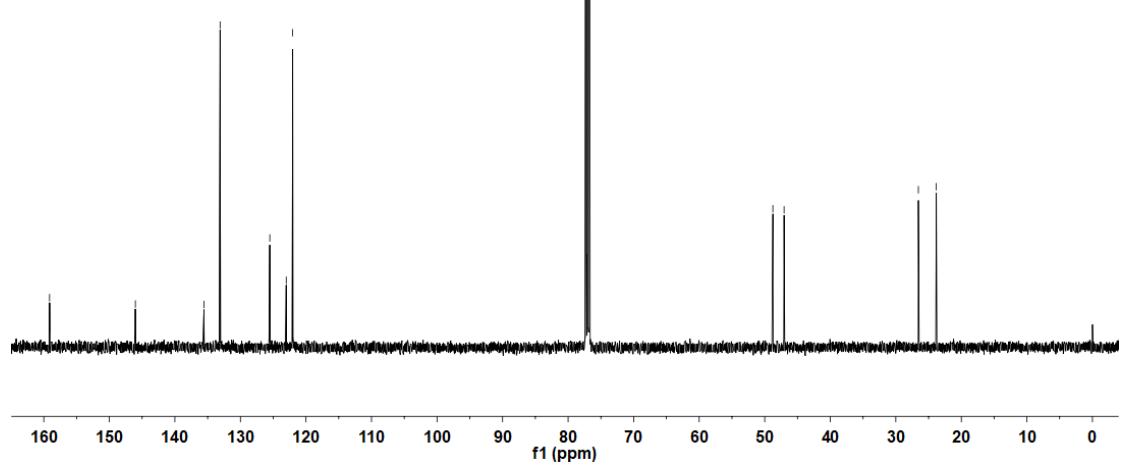

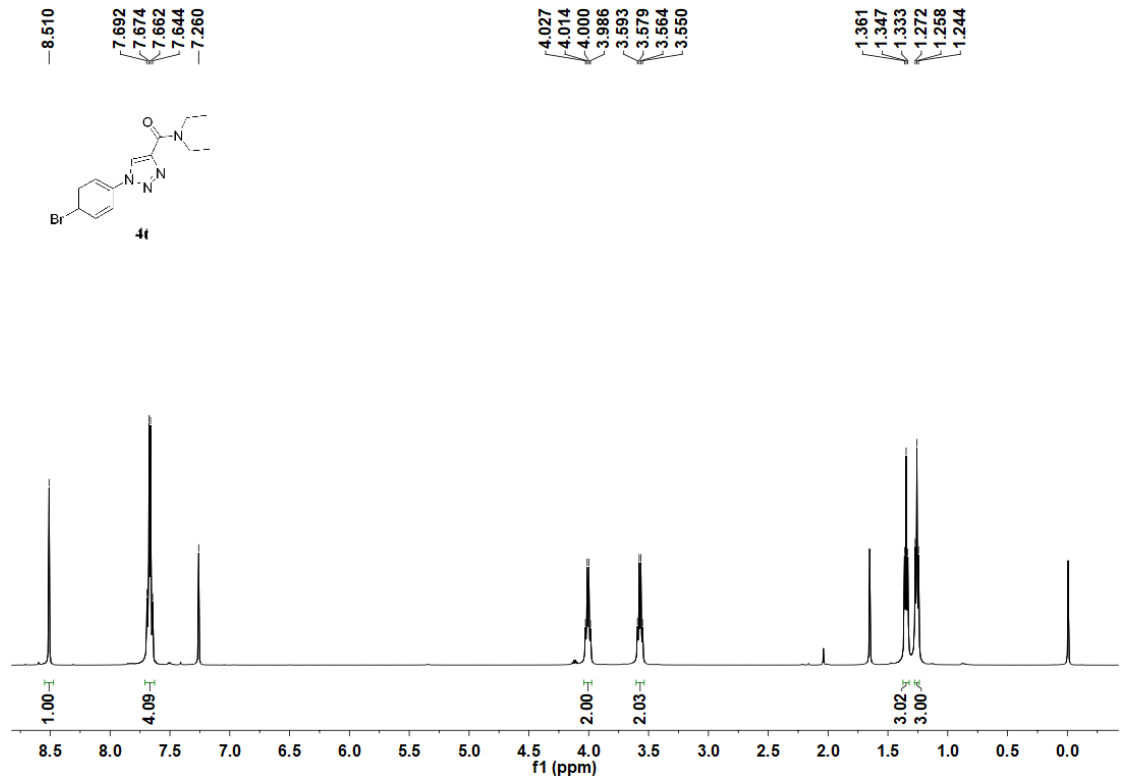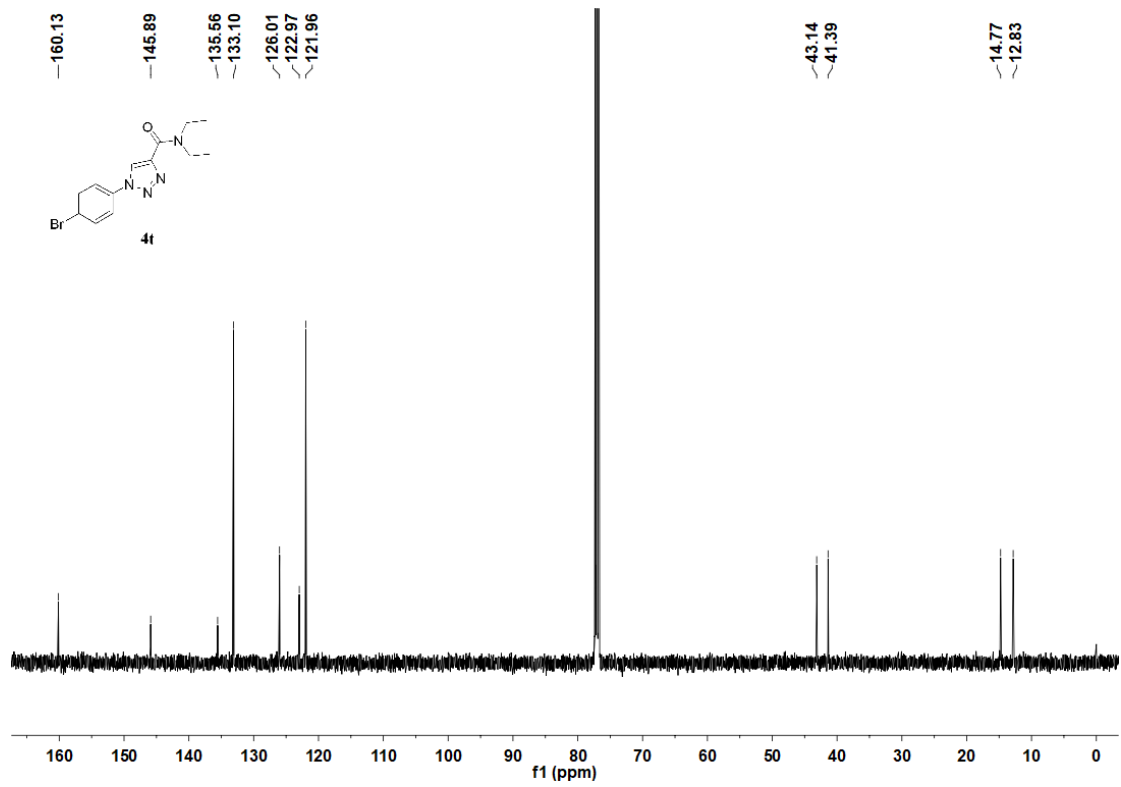

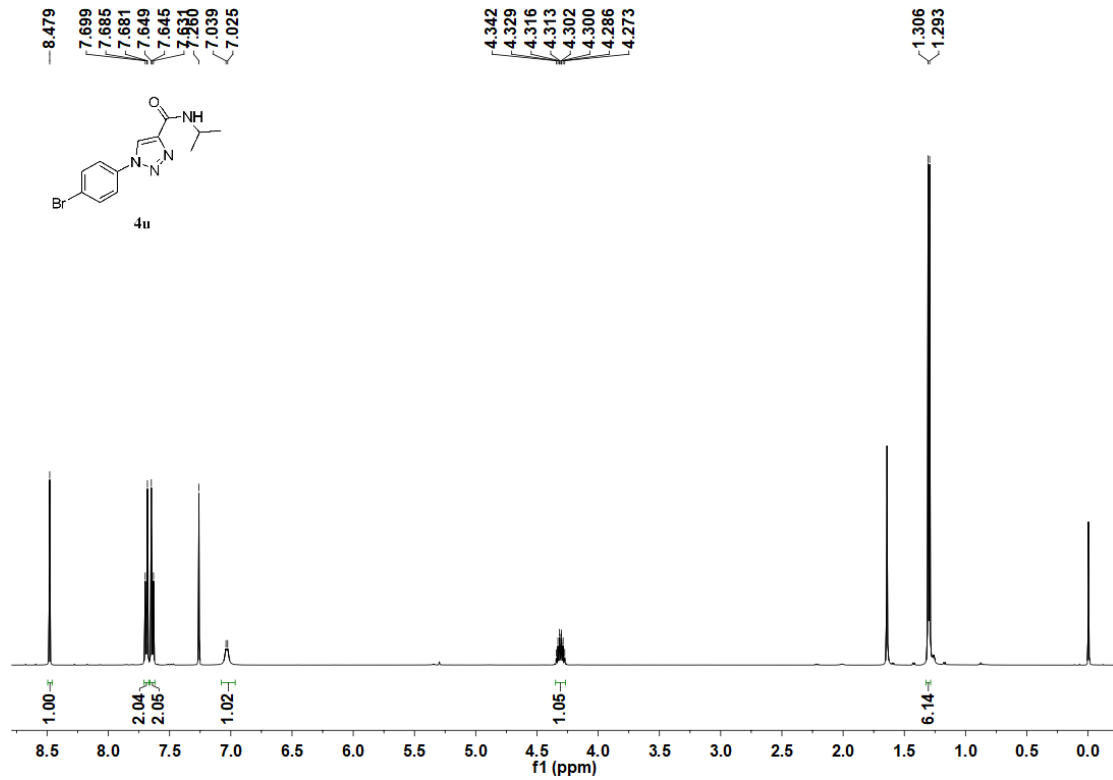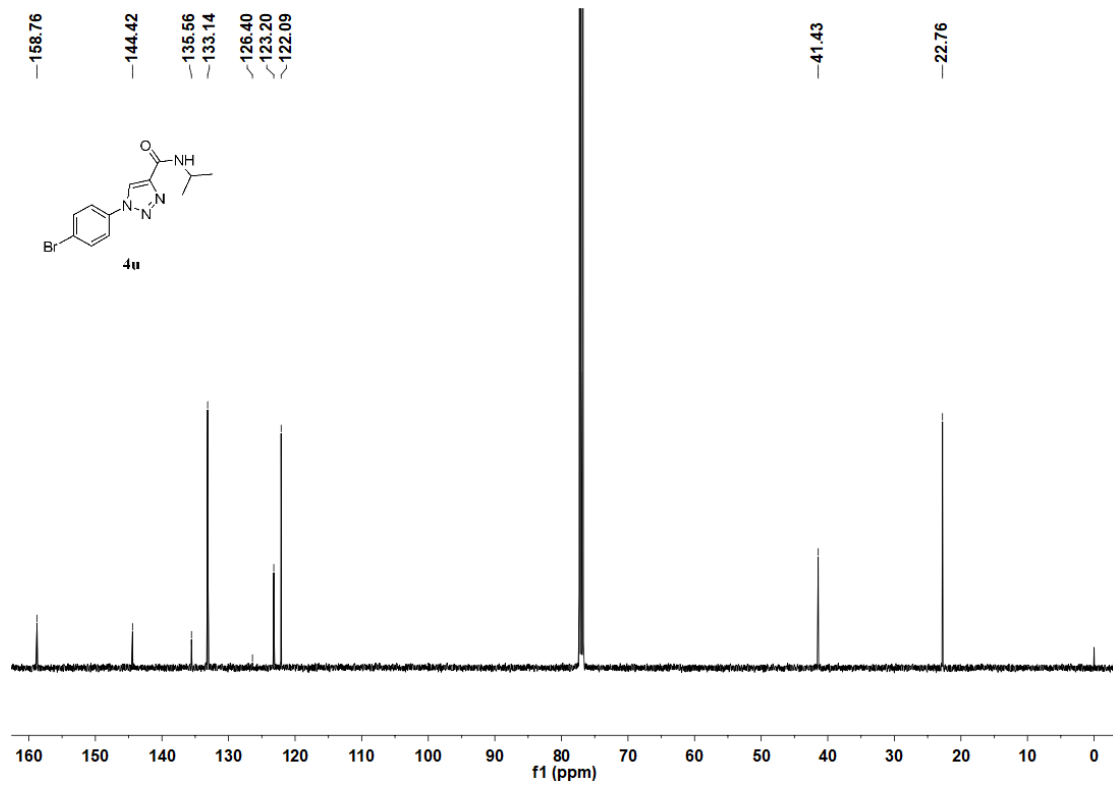

8.280  
7.753  
7.733  
7.597  
7.580  
7.560  
7.541  
7.523  
7.504  
7.260

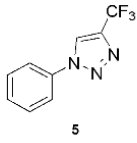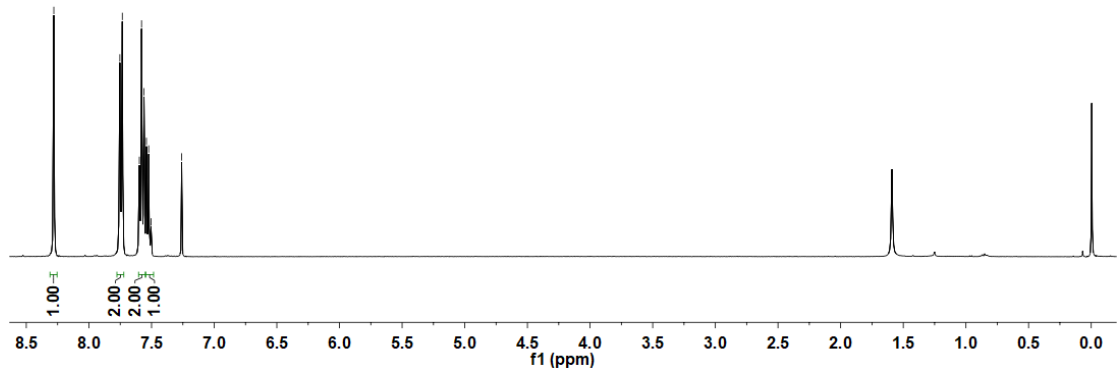

## 4. NMR/HRMS Spectra of Intermediates

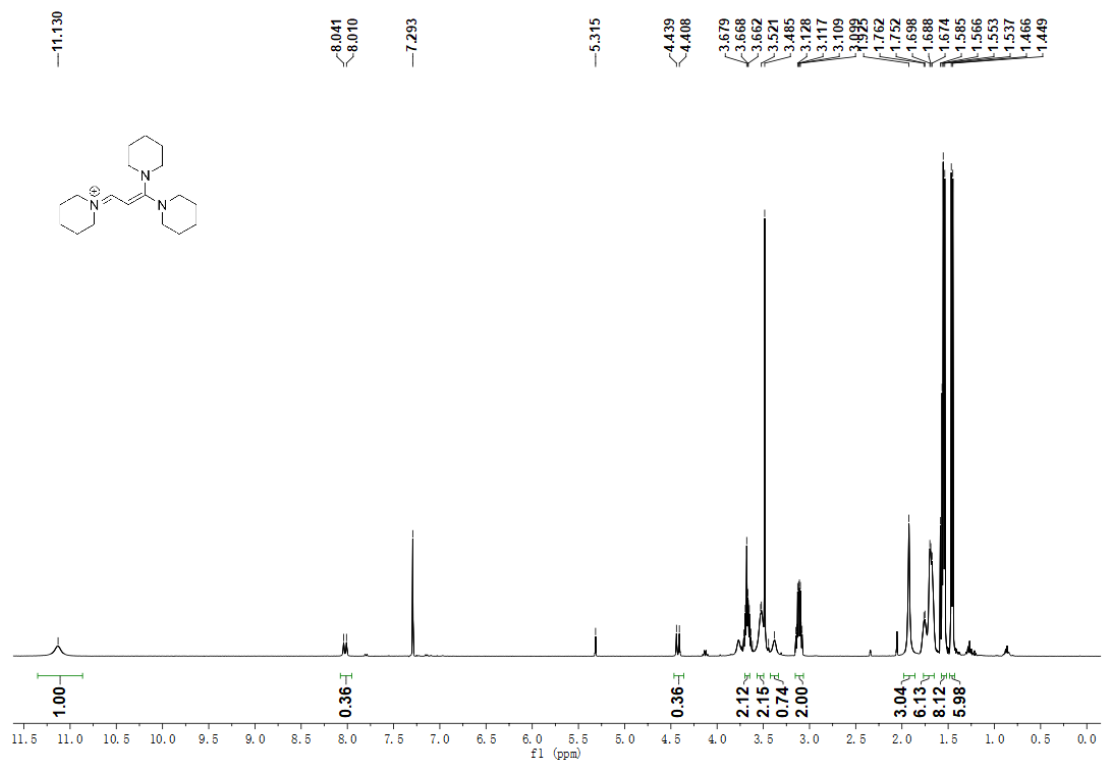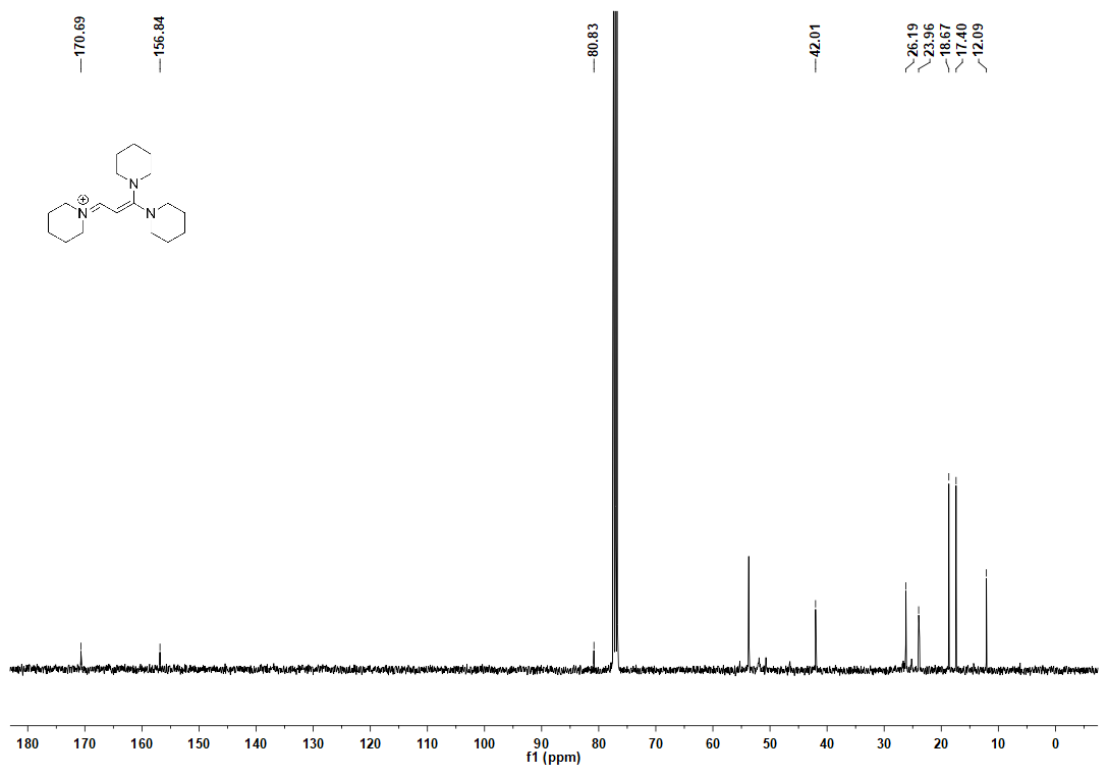

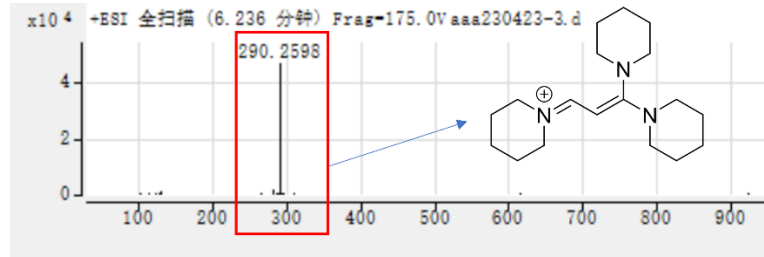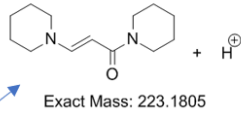

User Spectra

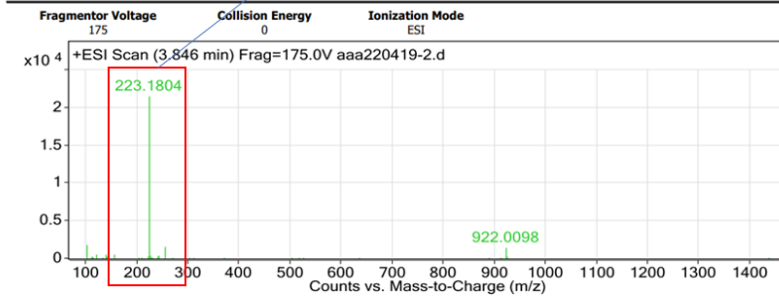

Supplement: d3qo00333g1.pdf [file d3qo00333g1.pdf]
